# Supplementary material for: How can a coordinated regional smoking cessation initiative be developed and implemented? A programme logic model to evaluate the ‘10,000 Lives’ health promotion initiative in Central Queensland, Australia
Source: PubMed Central journal article supplement — BMJ Open. 2021 Mar 26;11(3):e044649. doi: 10.1136/bmjopen-2020-044649 (PMC8006850; doi:10.1136/bmjopen-2020-044649), 2021-03-26
Supplement: bmjopen-2020-044649.draft_revisions.pdf [file bmjopen-2020-044649.draft_revisions.pdf]

# BMJ Open

BMJ Open is committed to open peer review. As part of this commitment we make the peer review history of every article we publish publicly available.

When an article is published we post the peer reviewers' comments and the authors' responses online. We also post the versions of the paper that were used during peer review. These are the versions that the peer review comments apply to.

The versions of the paper that follow are the versions that were submitted during the peer review process. They are not the versions of record or the final published versions. They should not be cited or distributed as the published version of this manuscript.

BMJ Open is an open access journal and the full, final, typeset and author-corrected version of record of the manuscript is available on our site with no access controls, subscription charges or pay-per-view fees (<http://bmjopen.bmj.com>).

If you have any questions on BMJ Open's open peer review process please email [info.bmjopen@bmj.com](mailto:info.bmjopen@bmj.com)

# BMJ Open

## Describing the inputs, activities and outputs of "10,000 Lives", a coordinated regional smoking cessation initiative in Central Queensland, Australia

|                               |                                                                                                                                                                                                                                                                                                                                                                                                                                                                                                                                                                                                                                                                                                                                                      |
|-------------------------------|------------------------------------------------------------------------------------------------------------------------------------------------------------------------------------------------------------------------------------------------------------------------------------------------------------------------------------------------------------------------------------------------------------------------------------------------------------------------------------------------------------------------------------------------------------------------------------------------------------------------------------------------------------------------------------------------------------------------------------------------------|
| Journal:                      | <i>BMJ Open</i>                                                                                                                                                                                                                                                                                                                                                                                                                                                                                                                                                                                                                                                                                                                                      |
| Manuscript ID                 | bmjopen-2020-044649                                                                                                                                                                                                                                                                                                                                                                                                                                                                                                                                                                                                                                                                                                                                  |
| Article Type:                 | Original research                                                                                                                                                                                                                                                                                                                                                                                                                                                                                                                                                                                                                                                                                                                                    |
| Date Submitted by the Author: | 09-Sep-2020                                                                                                                                                                                                                                                                                                                                                                                                                                                                                                                                                                                                                                                                                                                                          |
| Complete List of Authors:     | Khan, Arifuzzaman; The University of Queensland Faculty of Medicine, School of Public Health; Central Queensland Hospital and Health Service, Public Health Unit<br>Green, Kalie ; Central Queensland Hospital and Health Service, Public Health Unit<br>Khandaker, Gulam; Central Queensland Hospital and Health Service, Public Health Unit; The University of Queensland Faculty of Medicine, School of Public Health<br>Lawler, Sheleigh; The University of Queensland Faculty of Medicine, School of Public Health<br>Gartner, Coral; The University of Queensland Faculty of Medicine, School of Public Health; The University of Queensland Faculty of Health and Behavioural Sciences, Queensland Alliance for Environmental Health Sciences |
| Keywords:                     | PUBLIC HEALTH, SOCIAL MEDICINE, PREVENTIVE MEDICINE, Health policy < HEALTH SERVICES ADMINISTRATION & MANAGEMENT                                                                                                                                                                                                                                                                                                                                                                                                                                                                                                                                                                                                                                     |
|                               |                                                                                                                                                                                                                                                                                                                                                                                                                                                                                                                                                                                                                                                                                                                                                      |

SCHOLARONE™  
Manuscripts

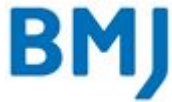

I, the Submitting Author has the right to grant and does grant on behalf of all authors of the Work (as defined in the below author licence), an exclusive licence and/or a non-exclusive licence for contributions from authors who are: i) UK Crown employees; ii) where BMJ has agreed a CC-BY licence shall apply, and/or iii) in accordance with the terms applicable for US Federal Government officers or employees acting as part of their official duties; on a worldwide, perpetual, irrevocable, royalty-free basis to BMJ Publishing Group Ltd ("BMJ") its licensees and where the relevant Journal is co-owned by BMJ to the co-owners of the Journal, to publish the Work in this journal and any other BMJ products and to exploit all rights, as set out in our [licence](#).

The Submitting Author accepts and understands that any supply made under these terms is made by BMJ to the Submitting Author unless you are acting as an employee on behalf of your employer or a postgraduate student of an affiliated institution which is paying any applicable article publishing charge ("APC") for Open Access articles. Where the Submitting Author wishes to make the Work available on an Open Access basis (and intends to pay the relevant APC), the terms of reuse of such Open Access shall be governed by a Creative Commons licence – details of these licences and which [Creative Commons](#) licence will apply to this Work are set out in our licence referred to above.

Other than as permitted in any relevant BMJ Author's Self Archiving Policies, I confirm this Work has not been accepted for publication elsewhere, is not being considered for publication elsewhere and does not duplicate material already published. I confirm all authors consent to publication of this Work and authorise the granting of this licence.

1  
2  
3  
4 **Describing the inputs, activities and outputs of “10,000 Lives” , a coordinated regional**  
5 **smoking cessation initiative in Central Queensland, Australia**  
6  
7

8 Arifuzzaman Khan<sup>1,2\*</sup>, Kalie Green<sup>2</sup>, Gulam Khandaker<sup>1,2</sup>, Sheleigh Lawler<sup>1</sup>, Coral  
9 Gartner<sup>1,3</sup>  
10

- 11 1. School of Public Health, Faculty of Medicine, The University of Queensland,  
12 Australia  
13
- 14 2. Central Queensland Public Health Unit, Central Queensland Hospital and Health  
15 Service, Australia  
16
- 17 3. Queensland Alliance for Environmental Health Sciences, Faculty of Health and  
18 Behavioural Sciences, The University of Queensland, Australia  
19  
20  
21  
22

23  
24 **Corresponding Author:**

25 Dr Arifuzzaman Khan, MBBS

26 **Address:** School of Public Health, Faculty of Medicine, The University of Queensland, 266  
27 Herston Rd, Brisbane, QLD 4006, Australia.  
28

29 **E-mail:** [mdarifuzzaman.khan@uqconnect.edu.au](mailto:mdarifuzzaman.khan@uqconnect.edu.au)  
30

31 **Phone:** +61749325178  
32  
33

34  
35  
36 **Keywords**

37 Smoking cessation, process evaluation, health promotion, regional health planning.  
38  
39  
40  
41  
42  
43  
44  
45  
46  
47  
48  
49  
50  
51  
52  
53  
54  
55  
56  
57  
58  
59  
60

## **Abstract:**

### ***Objective***

This study utilised a program logic model to describe the inputs, activities and outputs of the “10,000 Lives” smoking cessation initiative in Central Queensland, Australia

### ***Design***

A program logic model provided the framework for the process evaluation of “10,000 Lives”. The data were collected through document review, observation and key informant interviews, and subsequently analysed after coding and re-coding into classified themes, inputs, activities and outputs.

### ***Setting***

The prevalence of smoking is higher in the Central Queensland region of Australia compared to the national and state averages. In 2017, Central Queensland Hospital and Health Services set a target to reduce the percentage of adults who smoke from 16.7% to 9.5% in the Central Queensland region by 2030 as part of their strategic vision (‘Destination 2030’). Achieving this target is equivalent to 20,000 fewer smokers in Central Queensland, which should result in 10,000 fewer premature deaths due to smoking-related diseases. To translate this strategic goal into an actionable smoking-cessation initiative, the “10,000 Lives” health promotion program was officially launched on 1 November 2017.

### ***Result***

The activities of the initiative coordinated by a senior project officer included building clinical and community taskforces, organising summits and workshops, and regular communications to stakeholders. Public communication strategies (e.g., Facebook, radio, community exhibitions of “10,000 Lives”, and health-related events) were utilised to promote available smoking cessation support to the Central Queensland community.

### ***Conclusion***

The “10,000 Lives” initiative provides an example of a coordinated health promotion program to increase smoking cessation in a regional area through harnessing existing resources and strategic partnerships (e.g., Quitline). Documenting and describing the process evaluation of

1  
2  
3 the “10,000 Lives” model is important so that it can be replicated in other regional areas with  
4 a high prevalence of smoking.  
5  
6

### 7 **Strengths and limitations of this study**

- 10 • The study considered a standard evaluation framework (logic model) to describe the  
11 program.
- 12 • Multiple sources of data were collected and included to describe the process of the  
13 program
- 14 • The plan for impact evaluation of the program is discussed in the article.
- 15 • Some outputs may have been omitted due to lack of systematic documentation of all  
16 activities within the project field notes.  
17  
18  
19  
20  
21  
22

### 23 **Funding**

24  
25  
26 The research is funded by the collaborative research grant between School of Public health at  
27 University of Queensland and Central Queensland Public Health Unit which is awarded by  
28 the Central Queensland Hospital and Health Service (CQHHS93907).  
29  
30  
31

### 32 **Competing interests**

33  
34  
35 The authors have no conflict of interest to declare.  
36  
37  
38  
39  
40  
41  
42  
43  
44  
45  
46  
47  
48  
49  
50  
51  
52  
53  
54  
55  
56  
57  
58  
59  
60

## Introduction

Tobacco smoking remains the leading avoidable risk factor that contributes to the burden of death and disease in Australia. The 2015 Australian Burden of Disease Study estimated that 9.3% of the total disease burden, 13.3% of all deaths, and 443,235 Disability Adjusted Life Years (DALYs) were related to tobacco use.<sup>1,2</sup> In 2016, twelve percent of the adult population were daily smokers in Australia,<sup>3</sup> whereas 14.5% of adults in Queensland,<sup>4</sup> and 16.7% of adults in Central Queensland (CQ) smoked daily.<sup>5</sup> Reasons for the higher smoking prevalence in CQ may include the higher proportion of the population who experience socioeconomic disadvantage, compared to the state average.<sup>6,7</sup> Priority populations for smoking cessation assistance identified within CQ include pregnant women (17.0% smoking prevalence),<sup>8</sup> and people living in some local government areas within CQ, such as Gladstone 19.1% and Rockhampton 17.7% smoking prevalence.<sup>6,7</sup>

Tobacco control and smoking cessation programs are a shared responsibility between the Federal Government and the States and Territories in Australia.<sup>9</sup> The State and Territory governments implement many tobacco control and smoking cessation programs. Queensland has performed as one of the best states in Australia for tobacco control activities in recent years.<sup>10</sup> Programs and policies delivered by the Queensland Government include the Quitline service<sup>11</sup>, anti-smoking mass media campaigns, and smoke-free policies and laws. These have contributed to maintaining a downward trend in the daily smoking rate in Queensland over the last few decades.<sup>12</sup> However, a significantly higher rate of adult smoking than the state average has persisted in some regional areas like the CQ region.<sup>8</sup>

The higher prevalence of smoking in CQ compared with the whole of Queensland led CQ Health and Hospital Service (CQHHS) to prioritise smoking cessation while formulating the region's strategic health vision (known as 'Destination 2030') through a six month consultation process with CQ health personnel, consumers, priority groups, and community partners.<sup>13</sup> As part of 'Destination 2030',<sup>13</sup> CQHHS set a goal to reduce the adult daily smoking prevalence from 16.7% to 9.5% in CQ by 2030. Accomplishing this goal would be equivalent to 20,000 fewer smokers in CQ which was estimated to result in 10,000 lives that would be saved from premature death due to smoking-related diseases because half of all long-term-smokers die from a smoking related disease.<sup>14</sup> The strategic goal was translated into an actionable health promotion initiative to increase smoking cessation, which was named "10,000 Lives".<sup>15</sup> The

1  
2  
3 name of the “10,000 Lives” initiative builds on the previously highly successful “10,000 Steps  
4 Rockhampton” program, which promoted physical activity in Rockhampton.<sup>16,17</sup>

5  
6  
7 Tobacco control and smoking cessation are priorities of federal and state governments (e.g.,  
8 Queensland) in Australia, yet, there are always budgets constraints for preventive health  
9 promotion.<sup>18</sup> As such it is imperative to consider how to leverage off existing funded programs  
10 with small iterative changes and budgets. A low-cost and locally initiated program like “10,000  
11 Lives” is one such example, where this principle is being applied, with the aim of improving  
12 the health and wellbeing of the community. This paper documents the process evaluation of  
13 “10,000 Lives” so that researchers, health professionals and policy makers can use this  
14 information for future program planning.  
15  
16  
17  
18  
19  
20  
21

## 22 **Aim**

23  
24  
25 This study aims to describe the inputs (planning, resources and costs, and partners), activities  
26 and outputs of the “10,000 Lives” initiative of Central Queensland, Australia.  
27  
28

## 29 **Method**

30  
31  
32 An evaluation plan was formulated to investigate the inputs, activities, outputs, impact and  
33 outcome of the “10,000 Lives” initiative. A program logic model, adapted from a standard  
34 health promotion evaluation framework,<sup>19</sup> was developed for the evaluation plan. The  
35 evaluation framework was discussed among stakeholders who attended the “10,000 Lives”  
36 summit in Rockhampton, Australia, in November 2018. The model has guided understanding  
37 the program inputs and outputs for the evaluation. The model, shown in **Figure 1**, demonstrates  
38 the process evaluation framework by illustrating the interplay of the different factors that may  
39 influence the impacts and outcomes of the program activities. However, this paper focuses on  
40 describing the inputs (planning, resources and cost, and partnership), activities and outputs of  
41 the initiative.  
42  
43  
44  
45  
46  
47  
48

## 49 ***Target population of the “10,000 Lives” initiative***

50  
51  
52 The target population for the “10,000 Lives” initiative is all smokers living in the service  
53 catchment area of CQHHS (**Figure 2**), which includes 12 public hospitals in CQ.<sup>5</sup> In 2017, the  
54 population of the CQ region was ~220,000 people (4.5% of the Queensland population and  
55 0.9% of the Australia population).<sup>20</sup> There were 54,722 families (74,201 households) in 2017;  
56 the median age was 34.9 years; sixty-five per cent of the population were aged between 15–64  
57  
58  
59  
60



1  
2  
3 years.<sup>21</sup> Approximately six per cent of the population are Aboriginal and/or Torres Strait  
4 Islanders.<sup>7</sup> The rate of homelessness was 41.0 per 10,000 persons. The median total personal  
5 income per year was \$35,017 Australian dollars (AUD), with 50.2% having the highest level  
6 of schooling of Year 11 or 12 (or equivalent). In CQ, 25.7% of the population were in the most  
7 disadvantaged quintile and 10.1% of the population were in the least disadvantaged quintile,  
8 whereas in Queensland, 20% of the population were in most disadvantaged quintile and 20.0%  
9 in the least disadvantaged quintile in 2017.<sup>7</sup> According to a state-wide survey in the year  
10 preceding the launching of “10,000 Lives” an estimated ~28,000 adult daily smokers resided  
11 in CQ.<sup>22</sup> The daily smoking prevalence was highest (17.4%) in the 30-44 years age group. Also,  
12 the prevalence was high (18.5%) among the most disadvantaged quintile. The proportion of  
13 the determinants for poor health, i.e., ‘low-income households’, ‘early exit from school’,  
14 ‘unemployment’ and ‘mental health issue’ is higher in CQ than the whole of Queensland and  
15 Australia.<sup>23</sup>

### 26 *Study design, data collection and analysis*

27  
28 We conducted an exploratory investigation by critically appraising the project plan, partnership  
29 development, communication strategies, targeted project activities and overall health  
30 promotion activities for smoking cessation covered by the “10,000 Lives” initiative. Data were  
31 collected retrospectively for the period between July 2017 (initiation of planning) up to  
32 December 2019 (26 months after the official launch of “10,000 Lives” ) from field notes,  
33 project documentation notes, relevant policy documents, and key informant interviews with  
34 project personnel.

35  
36 A generic search was performed of relevant websites (i.e., Queensland Health:  
37 [www.health.qld.gov.au](http://www.health.qld.gov.au), CQ Health: [www.health.qld.gov.au/cq](http://www.health.qld.gov.au/cq), Department of Health of  
38 Australian Government: [www.health.gov.au](http://www.health.gov.au), and Australian Institute of Health and Welfare:  
39 [www.aihw.gov.au](http://www.aihw.gov.au)) for relevant policy documents, and social media pages (e.g., Facebook) for  
40 information about smoking cessation campaigns active during the study timeframe.

41  
42 Data were extracted from these sources and imported into NVIVO,<sup>24</sup> and then cleaned, coded,  
43 and classified into five themes: plans, resources and cost, partnerships, activities and outputs. A  
44 narrative synthesis and summary interpretation was completed and these are presented in the  
45 results section. The data sources and collection methods are shown in **Table 1**.

### 58 *Ethical approval*

1  
2  
3 The study was approved by CQHHS Human Research Ethics Committee (HREC)  
4 (HREC/2019/QCQ/50602).  
5  
6

### 7 *Patient and Public involvement*

8  
9 We used routine data source for process evaluation of the program. Individual participants were  
10 not involved in this study.  
11  
12

### 13 **Result**

14  
15 **Table 2** lists the key findings of the important areas for process evaluation (i.e., planning,  
16 resources and cost, partnerships, activities and project outputs) covered in this study in the first  
17 26 months since the “10,000 Lives” initiative launched. Major strategies employed by the  
18 “10,000 Lives” initiative are shown in **Figure 3**.  
19  
20  
21  
22

### 23 *Planning*

24  
25 At the program planning stage (July-August 2017), CQPHU, with the help of the Service  
26 Integration Coordinator of the Department of CQ Mental Health Alcohol and Other Drugs,  
27 developed a project proposal to establish a smoking cessation taskforce in CQ. The project  
28 proposal<sup>25</sup> stated the objectives of the initiative as:  
29  
30  
31  
32

33  
34 *“1. Establish a 10,000 Lives Taskforce: The taskforce will form the backbone of the project*  
35 *and through collective impact with the support of a wide range of community stakeholders*  
36 *large scale social change will be achieved. (“Collective impact” is a structured and disciplined*  
37 *approach to bringing cross-sector organisations together to focus on a common agenda that*  
38 *result in long-lasting improvement.).*  
39  
40  
41  
42

43  
44 *2. Establish a team of clinical champions to engage key stakeholders e.g. G.P.’s and provide*  
45 *health promotion activities, intervention and education to the broader community”.*  
46  
47

48 The aim was subsequently reflected in ‘Destination 2030’.<sup>13</sup> The initial plan considered  
49 strategies that adhered to the following guiding principles: i) *Population approach* of  
50 delivering a sustained, effective and comprehensive initiative for all, ii) *Whole system*  
51 *approach* of harnessing the many inter-related factors that can contribute to improving health  
52 and wellbeing, iii) *Evidence-based approach* of integrating knowledge from research evidence  
53 into implementation, iv) *Reducing inequality* by addressing the differences in health status in  
54 the community through recognising and responding to the vulnerable groups (e.g. the groups  
55 who have higher smoking prevalence), v) *Working in partnership* with government  
56  
57  
58  
59  
60

1  
2  
3 departments, community members, NGOs, and academic stakeholders, vi) *Building capacity*  
4 by developing an adequate number of skilled and empowered people, and vii) *Effective*  
5 *implementation and evaluation* for ensuring the platform to track the collective impact.<sup>25</sup> For  
6  
7 implementing the approaches, multiple and specific mini-projects were planned to target  
8  
9 priority groups. For example, plans were formulated to give more attention to specific  
10  
11 geographical areas (e.g., Gladstone and Woorabinda) and populations (e.g., mine workers and  
12  
13 Aboriginal and Torres Strait Islander people). Ambitious milestones were set during program  
14  
15 planning including a reduction of ~3,000 smokers by 2020', 'a reduction of ~14,000 smokers  
16  
17 by 2025' and 'a reduction of ~20,000 smokers by 2030'.<sup>25</sup>

### 18 19 ***Resources and costs***

20  
21 A senior project officer (SPO, Administrative Officer Grade 5) was recruited in December  
22  
23 2017 to coordinate the planned activities and manage the implementation of the program  
24  
25 strategies. Other resources utilised in the project included communication materials (e.g.,  
26  
27 Posters and leaflets, emails, news, website and social media content), promotion materials (e.g.,  
28  
29 information containing postcards, coffee cups, fridge magnets, water bottles and bags),  
30  
31 materials required for mobile stalls to display the project activities in community or health  
32  
33 events (e.g., display table, carbon monoxide breath testing for smokers), organising summits  
34  
35 and workshops, and ground signage. The approximate cost for running the program for 24  
36  
37 months (January 2018-December 2019) was \$280,748 (AUD) including the amount \$64,164  
38  
39 (AUD) for the research and evaluation component (**Table 2(c)**). The initiative was approved  
40  
41 by the CQHHS board and solely funded by CQHHS.

42  
43 In addition to the direct resource and costs, the initiative utilised in-kind support from the  
44  
45 CQPHU for administrative activities including administration staff support and operational  
46  
47 support during the period between starting the program planning in July 2017 and the official  
48  
49 launch of the initiative in November 2017. Also, the initiative utilised the existing resources  
50  
51 available for smoking cessation in CQ which included combination of 12-weeks-free NRTs  
52  
53 and telephone counselling via the Queensland Quitline's intensive Quit support program,<sup>12</sup>  
54  
55 subsidised smoking cessation pharmacotherapies through the Pharmaceutical Benefits Scheme,  
56  
57 Queensland Health's Quality Improvement Payment (an incentive program for clinicians), and  
58  
59 the collaborative support from existing smoking cessation programs (i.e., "Quit for You... Quit  
60  
for Baby", "Quit for You", "Yarn to Quit", B.strong).

### 60 ***Partnerships***

1  
2  
3 Developing partnerships and involving stakeholders in the implementation of “10,000 Lives”  
4 was a key strategy of the initiative. A strategic partnership was made with the Queensland  
5 Quitline<sup>11</sup> for enhancing the promotion of their existing intensive Quit support program which  
6 was available to rural, regional and remote communities with a higher than average smoking  
7 prevalence and accessing a monthly report to track Quitline registrations and participation  
8 status for smokers in CQ. Extensive in-kind support was provided by the Board and Chief  
9 Executive of CQHHS by arranging the project fund, and the Preventive Health Branch of  
10 Queensland Health by giving strategic advice and advocacy for implementing the smoke-free  
11 policies. Partnerships were built with different units and programs within CQHHS (e.g., Oral  
12 health, Mental health, ‘CQ Youth Connect’), community organisations (e.g., Rotary<sup>26</sup>), a  
13 foundation for youth mental health called ‘Headspace’,<sup>27</sup> a targeted brief intervention training  
14 program for Aboriginal and Torres Strait Islander people named ‘B.strong’,<sup>28</sup> a health  
15 promotion initiative for Aboriginal and Torres Strait Islander people called ‘Deadly Choices’,<sup>29</sup>  
16 local councils (city council and local government staff) and a non-government organisation  
17 (NGO) supporting and developing businesses and projects in CQ called “Capricorn  
18 Enterprise”<sup>30</sup> to promote and support smoking cessation activities for their own staff and client  
19 population (patient, youth, community and Aboriginal and Torres Strait Islander people who  
20 smoke). The project collaborated with a University in Australia for academic support for the  
21 program evaluation. Partnerships were developed with “Cancer Council Queensland”<sup>31</sup> for  
22 conducting training and workshops for the local clinicians, social workers and volunteers who  
23 were interested in supporting the initiative. The local Primary Health Network (PHN) actively  
24 collaborated with “10,000 Lives” initiative by distributing information to General  
25 Practitioners (GPs). Local sports clubs and radio stations also partnered with the initiative on  
26 health promotion activities.

### 27 *Activities*

28 The SPO coordinated the activities of “10,000 Lives” under the guidance of the director of  
29 CQPHU. The SPO took a pre-set plan and continuously adapted strategies (described in  
30 planning section) for implementing the program. The following range of activities were  
31 delivered to increase smoking cessation in CQ:

- 32 1. **Organising tobacco summits** to develop partnerships with clinicians, GPs, social  
33 workers, local council and industry staff, and local politicians.
- 34 2. **Establishing a clinical and community organisation taskforce** for smoking cessation to  
35 identify clinical and community organisation personnel to become a champion for smoking  
36  
37  
38  
39  
40  
41  
42  
43  
44  
45  
46  
47  
48  
49  
50  
51  
52  
53  
54  
55  
56  
57  
58  
59  
60

1  
2  
3 cessation. CQHHS clinicians were encouraged to conduct inpatient hospital and health  
4 care facility-based documentation and brief intervention via a standardised ‘Smoking  
5 Cessation Clinical Pathway (SCCP)’ form among patients who smoke, and to refer them  
6 to Quitline for accessing the intensive Quit support program. Community champions were  
7 encouraged to promote the Quitline program and other smoking cessation support (e.g.,  
8 My QuitBuddy app) among people who smoke.  
9

- 10  
11  
12  
13  
14 3. **Promoting smoking cessation** through emails, newsletters, local radio, social media  
15 pages (i.e., Facebook), digital billboard and ground signage, and exhibiting in various  
16 community expos and health-related events. The SPO explored various communication  
17 pathways to promote the available smoking cessation support, particularly the Quitline  
18 program. These included; conducting events on the local radio station (‘Triple M’), posting  
19 messages on Facebook pages (‘10,000 Lives’ , CQHHS and ‘Triple M’ Facebook pages),  
20 local newspapers (The Morning Bulletin and Gladstone Observer) and in the daily news  
21 and weekly bulletin of CQHHS and e-newsletters for GPs, and electronic billboard display  
22 in the center of the main city of the CQ region (i.e. Rockhampton CBD).  
23  
24  
25 4. **Advocating for smoke-free policies and programs** that could support smokers to quit.  
26 For example, the initiative established the ground signage and delivered tear off flyers  
27 promoting Smoke-free Healthcare in each of the hospital and community health campuses  
28 of CQHHS.  
29  
30  
31 5. **Implementing mini-projects** to give extra attention to priority populations. For example,  
32 a film competition on ‘smoke-free teens’ was organised to deliver a youth-centric smoking  
33 cessation message designed by youth for youth, and a workshop was conducted by the  
34 SPO to introduce carbon monoxide breath testers (**Smokerlyzer**) with *Gumma Gundoo*  
35 *Indigenous Maternal & Infant Care Outreach team* <sup>32</sup> to increase awareness amongst  
36 Aboriginal and Torres Strait Islander pregnant women of the adverse effects of antenatal  
37 smoking on mother and baby.  
38  
39  
40  
41  
42  
43  
44  
45  
46  
47  
48

### 49 **Outputs**

50  
51 The quantitative output measures from the “10,000 Lives” activities are shown in Table 2(a)  
52 and 2(b). Overall, the “10,000 Lives” initiative conducted seven smoking cessation summits  
53 and one Tackling Tobacco Forum, promoted and celebrated World No Tobacco Day  
54 regionally, completed at least twenty education sessions for newly recruited CQHHS staff, and  
55 conducted a combined smoking cessation workshop for the clinical and community champions.  
56  
57  
58 The SPO encouraged all the clinicians of CQHHS to attend the Smoking Cessation  
59  
60

1  
2  
3 Masterclasses conducted by Queensland Health (Metro South HHS and Metro North HHS),  
4 with 70 clinicians completing, and a three-day training course on nicotine addiction and  
5 smoking cessation,<sup>33</sup> which was completed by six clinicians. Forty Aboriginal and Torres Strait  
6 Islander volunteers were trained in Brief Intervention training conducted by the Menzies  
7 School of Health Research (B.strong).<sup>28</sup> The “10,000 Lives” initiative was exhibited in twelve  
8 community expos and nine health-related events. The initiative implemented two mini-projects  
9 for priority population (Aboriginal and Torres Strait Islander pregnant women, younger  
10 people). “10,000 Lives” collaborated with 15 different organisations including Hospital and  
11 Health Service, regional councils, University, Community Organisations and other initiatives  
12 to promote smoking cessation in CQ. The SPO shared updated resources and information about  
13 smoking cessation to ~3,400 staff of different partner organisations through emails and 4,800  
14 staff of CQHHS through posting in the daily news and a weekly bulletin called ‘The Drift’.  
15 As a result of communication through email, phone call, posting messages and in-person  
16 meetings by the SPO, at least seven clinical champions, two community champions, two  
17 political champions and a champion GP centre became actively involved and worked on the  
18 ground as the smoking cessation taskforce in CQ.  
19  
20  
21  
22  
23  
24  
25  
26  
27  
28  
29  
30

## 31 Discussion

32  
33  
34 This study describes the inputs, activities and outputs of the program logic model, documenting  
35 the process evaluation of the “10,000 Lives” initiative. This article explains why and how the  
36 initiative was implemented, and describes the way it operated over the 26 month period  
37 following its official launch in November 2017. This study also outlines how success of the  
38 program will be measured.  
39  
40  
41  
42

43  
44 The “10,000 Lives” initiative was launched to reduce the daily smoking rate in CQ, which is  
45 higher than the state average. Policymakers realised the high disease burden that is due to  
46 smoking and included the ambitious aim to reduce the smoking rate to 9.5% by 2030 in the  
47 Destination 2030 plan. The implementing organisation of the initiative is the local Public  
48 Health Unit which explored the existing and available smoking cessation support available in  
49 its region. A number of effective tobacco control and smoking cessation interventions were  
50 already available in the region, and the “10,000 Lives” initiative aimed to increase awareness  
51 and uptake of these interventions. In this way, the initiative focused on maximising the use of  
52 existing services available in the region.  
53  
54  
55  
56  
57  
58  
59  
60

1  
2  
3 The initial plan was guided by the standard principles (described in the *Planning* part of the  
4 results section) of program implementation. The initiative was launched in each of the local  
5 government areas of CQ region at a Smoking Cessation Summit. People from multiple sectors  
6 including Health and Community Services and state and local government were invited to  
7 attend the inaugural summit which ultimately facilitated the initiative to build the partnerships  
8 and identify champions. Partnerships were built with various government and non-government  
9 organisations so that the coverage of workplace based smoking cessation programs were  
10 increased and the smoke-free workplace policies implemented. Active partnership with  
11 Quitline Queensland assisted the initiative to promote their intensive Quit support program.  
12 The SPO was integral to building communication pathways to promote the smoking cessation  
13 support available. The regular communication and motivation to the stakeholders (clinical and  
14 community champions) helped the SPO to identify the opportunities (e.g., arrange training and  
15 workshop on smoking cessation) and tackle the barriers of smoking cessation work for them.  
16 This integral strategy of building partnerships and communication pathways became useful to  
17 build a clinical and a community taskforce of smoking cessation in CQ which leveraged the  
18 existing smoking cessation program and policies available in the region. This approach is an  
19 exemplar of running a health promotion campaign in a resource constrained environment.  
20  
21  
22  
23  
24  
25  
26  
27  
28  
29  
30  
31  
32

33 The 10,000 “Lives” initiative was built on the success of a previous health promotion campaign  
34 “10,000 Steps Rockhampton” in this region.<sup>16,17</sup> The Rockhampton area was chosen for  
35 “10,000 Steps Rockhampton” program because of the high prevalence of obesity.<sup>16</sup> Again,  
36 “10,000 Lives” initiative was launched in CQ to address the higher prevalence of smoking in  
37 this region. The “10,000 Lives” utilised the program strategies (e.g., media campaign,  
38 partnerships with clinicians, focusing on priority populations) that were also used in the  
39 “10,000 Steps Rockhampton” program.<sup>16</sup> Other similarities include the use of technology to  
40 measure exhaled carbon monoxide in “10,000 Lives” and pedometers in “10,000 Steps  
41 Rockhampton” to measure activity levels. The use of the Smokelyzer provided a teaching  
42 moment to discuss the health impacts of smoking by demonstrating the person’s exposure to  
43 one of the toxins in cigarette smoke, leading to increased autonomous-motivation to quit  
44 smoking . Creating autonomus motivation in people who smoke, often explained by the ‘Self-  
45 Determination Theory’,<sup>34</sup> is effective for promoting smoking cessation.<sup>35</sup>  
46  
47  
48  
49  
50  
51  
52  
53  
54  
55  
56

57 However, the implementation of the program was sometimes challenging, such as increasing  
58 clinician participation in delivering brief advice and quitline referrals. Some stakeholders  
59  
60

1  
2  
3 expected “10,000 Lives” to directly deliver smoking cessation services. However, this was  
4 beyond the scope and resources of the program.  
5  
6

7  
8 The “10,000 Lives” initiative is quite different from other smoking cessation programs in  
9 Australia (e.g., B.strong, Quitline) which deliver smoking cessation assistance directly to  
10 smokers. Rather, “10,000 Lives” intended to increase motivation to quit, and raise awareness  
11 of existing smoking cessation assistance that is available via these other programs. While the  
12 national tobacco campaign <sup>36</sup> and statewide anti-smoking campaigns primarily use paid  
13 advertising to disseminate the quit smoking message, the “10,000 Lives” program focused on  
14 low cost approaches to disseminating the quit smoking message via partnerships with local  
15 media and local clinical and community champions for promoting the smoking cessation  
16 interventions. This model has also been used in other health promotion programs implemented  
17 in New South Wales, Australia and in a community of North East England.<sup>37,38</sup> However, the  
18 findings of process evaluation using a logic model of those program were not found after  
19 serachin in relevant websites.  
20  
21  
22  
23  
24  
25  
26  
27  
28

29  
30 The strategies for achieving the goal of the “10,000 Lives” initiative reflect ecological models  
31 of health promotion’ which explain the multiple levels of influence on health behaviour. <sup>39</sup> The  
32 initiative put substantial efforts to increase the use of interventions of smoking cessation  
33 programs by involving the service providers in the community (e.g., clinicians, NGO  
34 personnel) such this is a ‘downstream’ approach. For example, the “10,000 Lives” initiative  
35 encouraged clinicians to deliver brief interventions with their patients and refer them to  
36 Quitline, and other relevant smoking cessation programs. The use of local radio, which  
37 involved sports stars discussing smoking cessation and posting messages on Facebook pages  
38 are examples of ‘midstream’ strategies. While the advocacy of state level policies and programs  
39 (e.g., smoke-free hospitals) are ‘upstream’ strategies. Thus the “10,000 Lives” program fits  
40 the multi-level population based health promotion model of McKinlay.<sup>40</sup>  
41  
42  
43  
44  
45  
46  
47  
48

49  
50 Overall, the initiative brought all the available smoking cessation support together and  
51 promoted the adoption of smoke free policies and programs. The stakeholders’s perspective  
52 and the impact of “10,000 Lives” are currently evaluated through analysis of the stakeholder-  
53 survey data and changes in the numbers and rate of referrals, program participation and  
54 interactions to Quitline, and the result will be reported through separate peer-reviewed  
55 publications.  
56  
57  
58  
59  
60



## Conclusion

The “10,000 Lives” is an example of a health promotion program which coordinates smoking cessation activities in a regional area by harnessing and improving awareness of existing resources (e.g. employing only one project officer). Utilising existing resources and programs can be a cost-effective approach in countries like Australia where effective smoking cessation interventions are already widely available, but uptake is suboptimal. Evaluation of impact and outcome of this initiative could inform the development of future regional smoking cessation programs.

## Contributors

AK, GK, SL and CG conceived and designed the study. AK conducted the key informant interviews. AK and KG extracted the data from different sources. AK performed the analysis of the data. AK, KG, GK, SL and CG interpreted the results. AK drafted the manuscript and all authors contributed with critical revisions to the contents of the manuscript. The final version of the manuscript was approved by all authors.

## Acknowledgement

We acknowledge the unrestricted support from Central Queensland Public Health Unit, Central Queensland Hospital and Health Service, Preventive Health Branch and Quitline Services from Queensland Health (Queensland Government). We thank Caron Williams, the first senior project officer of the “10,000 Lives” program, and Susie Cameron, the service integration officer of CQ Mental Health Alcohol and Other Drugs, for sharing the project information through informal discussions and emails. Also, we thank Linda Medlin, Acting Director of Aboriginal and Torres Strait Islander Health and Wellbeing in Central Queensland Hospital and Health Service for her kind review of the manuscript in the perspective of cultural respectability.

## References:

1. Australian Institute of Health and Welfare. Australian Burden of Disease Study 2015: Interactive data on risk factor burden. 2019; <https://www.aihw.gov.au/reports/burden-of-disease/interactive-data-risk-factor-burden/contents/tobacco-use>. Accessed 17/06/2019.
2. Data tables: ABDS 2015 Risk factors estimates. 2019. <https://www.aihw.gov.au/getmedia/28658401-d7f2-4e93-bb6f-9cbd2d5fa64c/ABDS-2015-Risk-factor-data.xlsx.aspx>.
3. Australian Bureau of Statistics (ABS). National Health Survey: First Results, 2017-18, cat. no. 4364.0.55.001. Released at 11:30 AM (CANBERRA TIME) 07/02/2019 . . 2018; <http://www.abs.gov.au/ausstats/abs@.nsf/Lookup/by%20Subject/4364.0.55.001~2017-18~Main%20Features~Smoking~85>. Accessed 30/8/2019.
4. Queensland Health. The health of Queenslanders 2016. Report of the Chief Health Officer Queensland. Queensland Government. Brisbane 2016. <https://www.publications.qld.gov.au//dataset/chief-health-officer-reports>. Accessed 07/08/2019.
5. Queensland Government. Central Queensland Hospital and Health Service. 2016; <https://www.health.qld.gov.au/cq>. Accessed 26/01/2019, 2019.
6. Queensland Health. Detailed Queensland and regional preventive health survey results. *Preventive health surveys* 2019; <https://www.health.qld.gov.au/research-reports/population-health/preventive-health-surveys/detailed-data#documentation>. Accessed 29/08/2019.
7. Queensland Regional Profiles. Queensland Government; 2019. <https://statistics.qgso.qld.gov.au/qld-regional-profiles>. Accessed 29/07/2019.
8. Queensland Health. *The Health of Queenslanders 2018. Report of the Chief Health Officer Queensland; Hospital and Health Service profiles*. 2018.
9. Australian Government the Department of Health. National Tobacco Strategy. 2018; <https://www1.health.gov.au/internet/main/publishing.nsf/Content/tobacco-strategy>. Accessed 07/08/2019.
10. AUSTRALIAN COUNCIL ON SMOKING AND HEALTH. National Tobacco Control Scoreboard. 2019; <https://www.acosh.org/what-we-do/national-tobacco-control-scoreboard/>. Accessed 04/06/2020.
11. Queensland Health. Where Quitters Click. 2019; <https://www.health.qld.gov.au/news-alerts/campaigns/tobacco/where-quitters-click-campaign>. Accessed 08/08/2019.
12. Queensland Health. Smoking Prevention Strategy 2017 to 2020. 2017; [https://www.health.qld.gov.au/\\_data/assets/pdf\\_file/0022/651802/health-wellbeing-strategic-framework-smoking.pdf](https://www.health.qld.gov.au/_data/assets/pdf_file/0022/651802/health-wellbeing-strategic-framework-smoking.pdf). Accessed 04/06/2020.
13. Central Queensland Hospital and Health Services. Destination 2030. 2017; [https://www.health.qld.gov.au/\\_data/assets/pdf\\_file/0037/669772/destination-2030-full.pdf](https://www.health.qld.gov.au/_data/assets/pdf_file/0037/669772/destination-2030-full.pdf). Accessed 08/08/2019.
14. World Health Organization (WHO). Tobacco. 2019; <https://www.who.int/news-room/fact-sheets/detail/tobacco>. Accessed 05/08/2019, 2019.
15. Queensland Health. 10000 Lives CQ Smoking Cessation Project. 2020; <https://clinicalexcellence.qld.gov.au/improvement-exchange/10000-lives-cq-smoking-cessation-project>. Accessed 08/05/2020.
16. Brown WJ, Eakin E, Mummery K, Trost SG. 10,000 Steps Rockhampton: Establishing a multi-strategy physical activity promotion project in a community. *Health Promotion Journal of Australia*. 2003;14(2):95-100.
17. Wendy JB, Kerry M, Elizabeth E, Grant S. 10,000 Steps Rockhampton: Evaluation of a Whole Community Approach to Improving Population Levels of Physical Activity. *Journal of Physical Activity and Health*. 2006;3(1):1-14.

- 1
- 2
- 3
- 4 18. Jackson H, Shiell A. *Preventive health: How much does Australia spend and is it enough?*. Canberra 2017.
- 5
- 6 19. Prevention and Population Health Branch 2010, Evaluation framework for health promotion and disease prevention programs, Melbourne, Victorian Government Department of Health. <https://www2.health.vic.gov.au/about/publications/policiesandguidelines/Evaluation-framework-for-health-promotion-and-disease-prevention-programs>. Accessed 10/12/2018.
- 7
- 8
- 9
- 10 20. Australian Bureau of Statistics, 2019, *Themes: Central Queensland*. [https://itt.abs.gov.au/itt/r.jsp?RegionSummary&region=308&dataset=ABS\\_REGIONAL\\_ASGS\\_2016&geoconcept=ASGS\\_2016&datasetASGS=ABS\\_REGIONAL\\_ASGS2016&datasetLGA=ABS\\_REGIONAL\\_LGA2016&regionLGA=LGA\\_2016&regionASGS=ASGS\\_2016](https://itt.abs.gov.au/itt/r.jsp?RegionSummary&region=308&dataset=ABS_REGIONAL_ASGS_2016&geoconcept=ASGS_2016&datasetASGS=ABS_REGIONAL_ASGS2016&datasetLGA=ABS_REGIONAL_LGA2016&regionLGA=LGA_2016&regionASGS=ASGS_2016). Accessed 18/07/2019.
- 11
- 12
- 13
- 14
- 15
- 16 21. Boykan R, Messina CR. A Comparison of Parents of Healthy Versus Sick Neonates: Is There a Difference in Readiness and/or Success in Quitting Smoking? *Hospital pediatrics*. 2015;5(12):619-623.
- 17
- 18
- 19 22. Asfar T, Caban-Martinez AJ, McClure LA, et al. A cluster randomized pilot trial of a tailored worksite smoking cessation intervention targeting Hispanic/Latino construction workers: Intervention development and research design. *Contemporary clinical trials*. 2018;67:47-55.
- 20
- 21
- 22 23. Torrens University Australia (PHIDU). Social Health Atlas; Maps. 2019; <http://phidu.torrens.edu.au/social-health-atlases/maps>. Accessed 31/07/2019, 019.
- 23
- 24
- 25 24. QSR International. NVivo Qualitative Data Analysis Software [Software]. . 1999; <https://qsrinternational.com/nvivo/nvivo-products/>.
- 26
- 27 25. Central Queensland Hospital and Health Services. Project Plan: 10,000 Lives. In. Rockhampton, Queensland, Australia Central Queensland Public Health Unit; 2017:Page 2 of 16.
- 28
- 29 26. Rotary Club. Rotary Districts 9570, Central Queensland. <https://rotary9570.org/>. Accessed 05/05/2020.
- 30
- 31 27. Headspace. Headspace Rockhampton. <https://headspace.org.au/headspace-centres/rockhampton/>. Accessed 05-05-2020.
- 32
- 33 28. Menzies School of Health Researc. B.strong; Quit, Eat & Move for Health. <https://www.bstrong.org.au/>. Accessed 01/08/2019.
- 34
- 35 29. Deadly Choices. Deadly Choices. <https://deadlychoices.com.au/>.
- 36 30. Capricorn enterprise. CAPRICORN ENTERPRISE. <https://capricornenterprise.com.au/>. Accessed 05-05-2020.
- 37
- 38 31. Cancer Council Queensland. Cancer Council <https://cancerqld.org.au/>. Accessed 05-05-2020.
- 39 32. Queensland Health. Gumma Gundoo Indigenous maternal and infant outreach. 2019; <https://www.health.qld.gov.au/cq/services/gumma-gundoo>. Accessed 06/05/2020.
- 40
- 41 33. The Australasian Professional Society on Alcohol and other Drugs. NICOTINE ADDICTION & SMOKING CESSATION TRAINING COURSE. 2018; <https://www.apsad.org.au/news-a-media/209-nicotine-addiction-smoking-cessation-training-course>. Accessed 20/3/2020.
- 42
- 43 34. Deci EL, Ryan RM. Self-determination theory. In: *Handbook of theories of social psychology, Vol. 1*. Thousand Oaks, CA: Sage Publications Ltd; 2012:416-436.
- 44
- 45 35. Williams GG, Gagné M, Ryan RM, Deci EL. Facilitating autonomous motivation for smoking cessation. *Health Psychology*. 2002;21(1):40-50.
- 46
- 47 36. Hill D, Carroll T. Australia's national tobacco campaign. *Tobacco Control*. 2003;12(suppl 2):ii9-ii14.
- 48
- 49 37. Campbell MA, Finlay S, Lucas K, Neal N, Williams R. Kick the habit: a social marketing campaign by Aboriginal communities in NSW. *Australian Journal of Primary Health*. 2014;20(4):327-333.
- 50
- 51 38. McGeechan GJ, Woodall D, Anderson L, Wilson L, O'Neill G, Newbury-Birch D. A Coproduction Community Based Approach to Reducing Smoking Prevalence in a Local Community Setting. *Journal of environmental and public health*. 2016;2016:5386534.
- 52
- 53 39. Promoting Health: Intervention Strategies from Social and Behavioral Research. *American Journal of Health Promotion*. 2001;15(3):149-166.
- 54
- 55
- 56
- 57
- 58
- 59
- 60

- 1  
2  
3  
4  
5  
6  
7  
8  
9  
10  
11  
12  
13  
14  
15  
16  
17  
18  
19  
20  
21  
22  
23  
24  
25  
26  
27  
28  
29  
30  
31  
32  
33  
34  
35  
36  
37  
38  
39  
40  
41  
42  
43  
44  
45  
46  
47  
48  
49  
50  
51  
52  
53  
54  
55  
56  
57  
58  
59  
60
40. McKinlay JB. The promotion of health through planned sociopolitical change: challenges for research and policy. *Social science & medicine* (1982). 1993;36(2):109-117.
41. Queensland Government. Central Queensland Hospital and Health Service maps. 2019; <https://www.health.qld.gov.au/maps/mapto/centralqld>. Accessed 18/07/2019.

For peer review only

Figures and Tables

Figure 1. Logic model for evaluation of “10,000 Lives” initiative

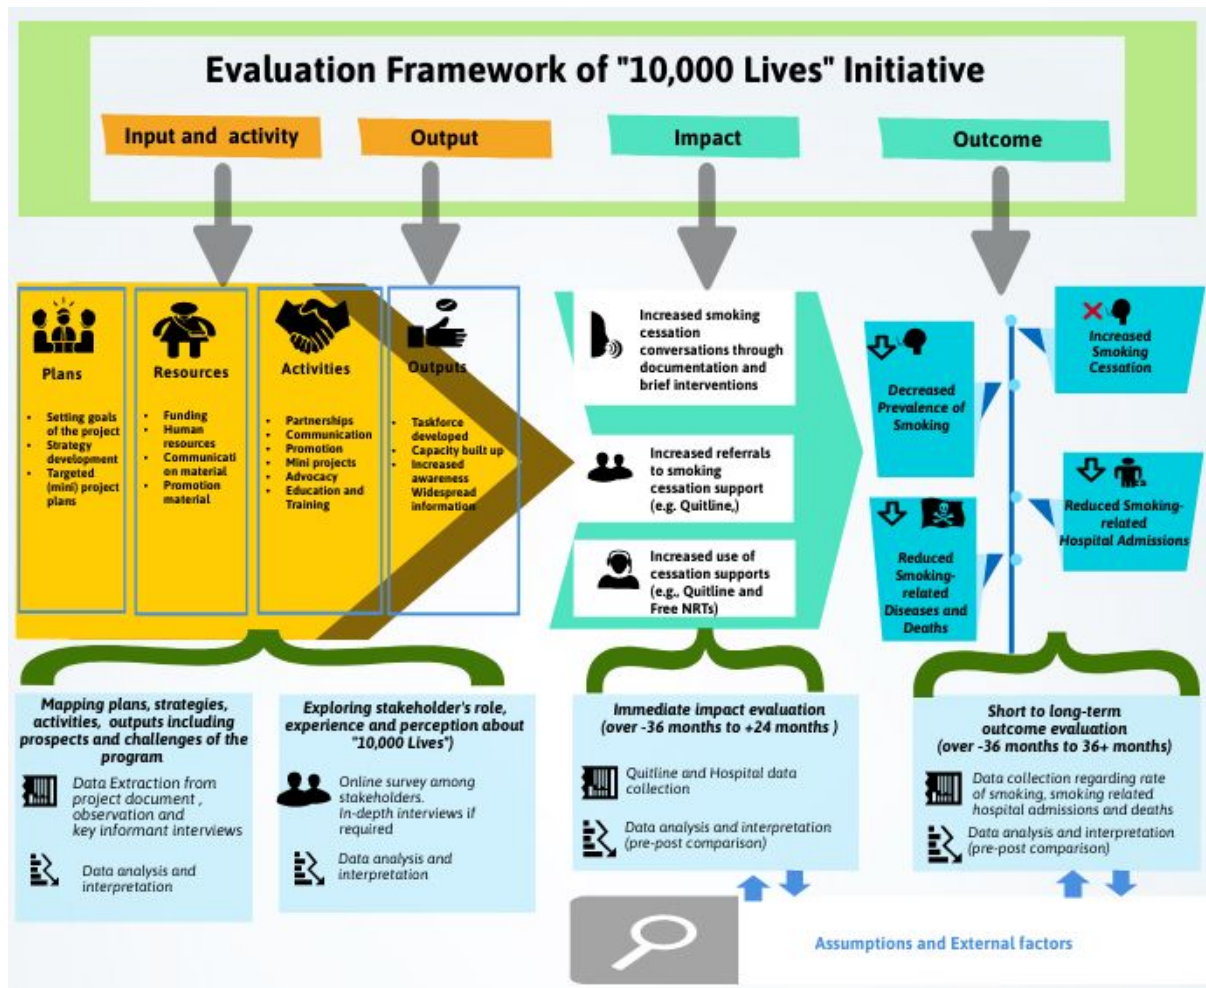

Figure 2. Study Area Map; “10,000 Lives” initiative’s catchment area

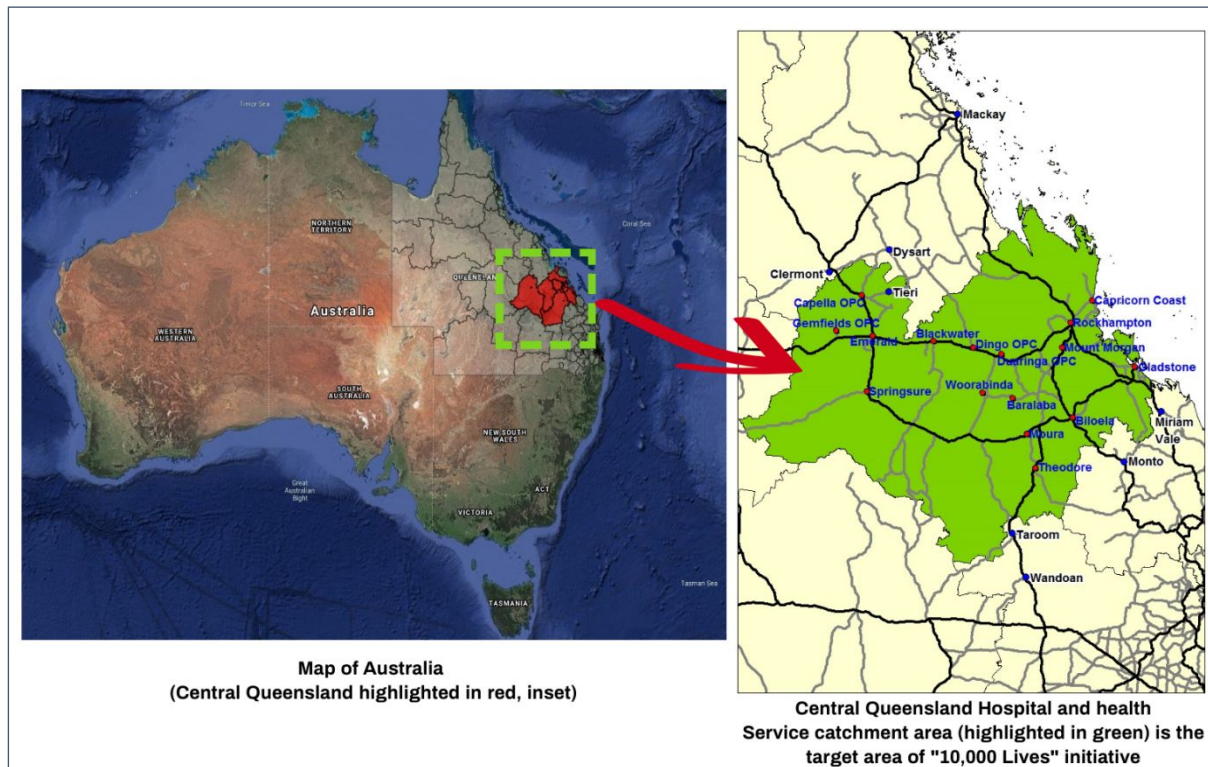

Map showing the “10,000 Lives” initiative’s target area (highlighted in green) which is the CQHHS catchment area. Red dots are indicated for the hospitals of CQHHS (Source: Queensland Health website<sup>41</sup>)

**Table 1. Summary of data sources and collection method for each evaluation topic**

| Themes                                | Data sources                                                                                                                                   | Collection method                                                                          |
|---------------------------------------|------------------------------------------------------------------------------------------------------------------------------------------------|--------------------------------------------------------------------------------------------|
| <i>Inputs</i>                         |                                                                                                                                                |                                                                                            |
| Planning                              | Project planning documents and policy document 'Destination 2030' <sup>13</sup>                                                                | Document review and internet search                                                        |
| Resource                              | Project management documents                                                                                                                   | Document review                                                                            |
| Partnership                           | Project planning and management documents, Key informant interviews                                                                            | Document review, Key informant interviews                                                  |
| <i>Activities</i>                     |                                                                                                                                                |                                                                                            |
|                                       | Project management documents, Master file for project management, Key informant interviews, Working group documents, Websites and Social media | Document and content review, Websites, Social media, Observation, Key informant interviews |
| <i>Outputs</i>                        |                                                                                                                                                |                                                                                            |
|                                       | Project management documents, Master spread sheet, Stakeholders meeting documents, Attendance sheet, and Key informant interviews              | Document review, Key informant interviews                                                  |
| <i>Anticipated impact and outcome</i> |                                                                                                                                                |                                                                                            |
|                                       | Project management documents, Policy documents, Key informant interviews                                                                       | Project document review, Policy documents review, Key informant interviews                 |

**Table 2. Description of project planning, resources, partnerships, activities and outputs in first 26 months of project launched**

| Planning                                                                                                                                                                                                                                                                      | Resources and Cost                                                                                                                                                                                        | Partnerships                                                                                                                                                                                                                                                                                                                                     | Activities                                                                                                                                                                                                                                     | Outputs                                                                                                 |
|-------------------------------------------------------------------------------------------------------------------------------------------------------------------------------------------------------------------------------------------------------------------------------|-----------------------------------------------------------------------------------------------------------------------------------------------------------------------------------------------------------|--------------------------------------------------------------------------------------------------------------------------------------------------------------------------------------------------------------------------------------------------------------------------------------------------------------------------------------------------|------------------------------------------------------------------------------------------------------------------------------------------------------------------------------------------------------------------------------------------------|---------------------------------------------------------------------------------------------------------|
| <b><i>Aims and objectives</i></b>                                                                                                                                                                                                                                             | <b><i>Human resource</i></b>                                                                                                                                                                              | <b><i>Implementing intervention</i></b>                                                                                                                                                                                                                                                                                                          | <b><i>Organised summit and forum</i></b>                                                                                                                                                                                                       | <b><i>Numbers of different outputs are shown in below tables (Table 2a and 2b)</i></b>                  |
| <ul style="list-style-type: none"> <li>Reducing smoking prevalence</li> <li>Saving lives from smoking-related deaths</li> </ul>                                                                                                                                               | <ul style="list-style-type: none"> <li>One senior project officer</li> </ul>                                                                                                                              | <ul style="list-style-type: none"> <li>Quitline</li> <li>CQHHS</li> <li>Local community development service</li> <li>GP</li> <li>Headspace-works for Youth Mental Health; funded by Department of Health of the Australian Government</li> <li>Every child CQ-community service initiative- ,</li> <li>My Health for Life, B. strong)</li> </ul> | <ul style="list-style-type: none"> <li>Launched initiative</li> <li>Invited clinical, community and political partners</li> <li>Identified champions</li> </ul>                                                                                |                                                                                                         |
| <b><i>Strategies</i></b>                                                                                                                                                                                                                                                      | <b><i>Communication material</i></b>                                                                                                                                                                      |                                                                                                                                                                                                                                                                                                                                                  | <b><i>Developed taskforces</i></b>                                                                                                                                                                                                             |                                                                                                         |
| <ul style="list-style-type: none"> <li>Establish a smoking cessation taskforce</li> </ul>                                                                                                                                                                                     | <ul style="list-style-type: none"> <li>Poster</li> <li>Leaflets</li> <li>Media documents (e.g., newsletter, Facebook pages)</li> </ul>                                                                    |                                                                                                                                                                                                                                                                                                                                                  | <ul style="list-style-type: none"> <li>Identified champions</li> <li>Repeated communication and motivation</li> <li>Identified opportunities</li> <li>Tackled barriers of work</li> <li>Advocated training and capacity development</li> </ul> |                                                                                                         |
| <b><i>Guiding principle</i></b>                                                                                                                                                                                                                                               | <b><i>Promotion material</i></b>                                                                                                                                                                          |                                                                                                                                                                                                                                                                                                                                                  |                                                                                                                                                                                                                                                |                                                                                                         |
| <ol style="list-style-type: none"> <li>A Population approaches</li> <li>Whole system approach</li> <li>Evidence-based approach</li> <li>Reducing inequality</li> <li>Building capacity</li> <li>Building capacity</li> <li>Effective implementation and evaluation</li> </ol> | <ul style="list-style-type: none"> <li>Digital Billboard</li> <li>Ground Signage</li> <li>Information marked gift items (e.g. coffee mug, water bottle, bag, fridge magnets)</li> <li>Postcard</li> </ul> | <b><i>Advocacy</i></b>                                                                                                                                                                                                                                                                                                                           |                                                                                                                                                                                                                                                |                                                                                                         |
|                                                                                                                                                                                                                                                                               | <b><i>Materials for exhibition</i></b>                                                                                                                                                                    |                                                                                                                                                                                                                                                                                                                                                  |                                                                                                                                                                                                                                                | <b><i>Campaigned and promoted smoking cessation interventions</i></b>                                   |
|                                                                                                                                                                                                                                                                               | <ul style="list-style-type: none"> <li>Smokerlyzer</li> <li>Poster</li> <li>Leaflet</li> <li>Table</li> <li>Display board</li> </ul>                                                                      | <ul style="list-style-type: none"> <li>Preventive Health Branch of Queensland Health</li> <li>Primary Health Network (PHN)-</li> </ul>                                                                                                                                                                                                           |                                                                                                                                                                                                                                                | <ul style="list-style-type: none"> <li>Newsletter</li> <li>Local radio</li> <li>Social media</li> </ul> |
| <b><i>Pre-set milestones</i></b>                                                                                                                                                                                                                                              |                                                                                                                                                                                                           |                                                                                                                                                                                                                                                                                                                                                  |                                                                                                                                                                                                                                                |                                                                                                         |



1  
2  
3  
4  
5  
6  
7  
8  
9  
10  
11  
12  
13  
14  
15  
16  
17  
18  
19  
20  
21  
22  
23  
24  
25  
26  
27  
28  
29  
30  
31  
32  
33  
34  
35  
36  
37  
38  
39  
40  
41  
42  
43  
44  
45  
46

---

|                                                                                                                                                                                                                                                                       |                                                                                                                                                                                                                |                                                                                                                                                                                                                                                                                                                                |                                                                                                                                                                                                                                                                                                                                                                                                                                          |
|-----------------------------------------------------------------------------------------------------------------------------------------------------------------------------------------------------------------------------------------------------------------------|----------------------------------------------------------------------------------------------------------------------------------------------------------------------------------------------------------------|--------------------------------------------------------------------------------------------------------------------------------------------------------------------------------------------------------------------------------------------------------------------------------------------------------------------------------|------------------------------------------------------------------------------------------------------------------------------------------------------------------------------------------------------------------------------------------------------------------------------------------------------------------------------------------------------------------------------------------------------------------------------------------|
| <ul style="list-style-type: none"> <li>• A reduction of ~3,000 smokers by 2020</li> <li>• A reduction of ~14,000 smokers (by 2025)</li> <li>• A reduction of ~20,000 smokers (equal to saving ~10,000 Lives from smoking-related premature deaths) by 2030</li> </ul> | <p><b>Cost</b></p> <ul style="list-style-type: none"> <li>• Labour cost</li> <li>• Non-labour cost</li> <li>• Cost for research and evaluation</li> <li>• Expenditure is shown in <b>Table 2(c)</b></li> </ul> | <p>Federal Government Agency</p> <ul style="list-style-type: none"> <li>• Rotary Club</li> <li>• Six local councils within the district</li> <li>• Business industry association (Capricorn enterprise) of CQ</li> </ul> <p><b>Research and Evaluation</b></p> <ul style="list-style-type: none"> <li>• PhD project</li> </ul> | <ul style="list-style-type: none"> <li>• Digital billboard</li> <li>• Community expos</li> <li>• Health events</li> </ul> <p><b>Advocated policy</b></p> <ul style="list-style-type: none"> <li>• Smoke-free hospitals</li> </ul> <p><b>Implemented mini projects</b></p> <ul style="list-style-type: none"> <li>• Smoke-free teens</li> <li>• Reduce smoking rate among Aboriginal and Torres Strait Islander pregnant women</li> </ul> |
|-----------------------------------------------------------------------------------------------------------------------------------------------------------------------------------------------------------------------------------------------------------------------|----------------------------------------------------------------------------------------------------------------------------------------------------------------------------------------------------------------|--------------------------------------------------------------------------------------------------------------------------------------------------------------------------------------------------------------------------------------------------------------------------------------------------------------------------------|------------------------------------------------------------------------------------------------------------------------------------------------------------------------------------------------------------------------------------------------------------------------------------------------------------------------------------------------------------------------------------------------------------------------------------------|

---

**Table 2(a). Occurrence of different activities and events implemented by “10,000 Lives” initiative in first 26 months**

| Event name                                                                                                                  | Frequency (n) |
|-----------------------------------------------------------------------------------------------------------------------------|---------------|
| Smoking cessation summits organised                                                                                         | 7             |
| ‘World No Tobacco Day’ campaign (including a tobacco forum)                                                                 | 2             |
| Number of mini-projects implemented for priority populations                                                                | 2             |
| Film competition with the theme of smoking cessation for young people, organised                                            | 1             |
| Attended health event with “10,000 Lives” stall                                                                             | 9             |
| Attended community expo and event with "10,000 Lives stall"                                                                 | 12            |
| Brief education sessions delivered to newly recruited CQHHS staff                                                           | 20            |
| In-person meeting conducted                                                                                                 | 97            |
| Facebook pages (10000 Lives CQ, CQ Health and Triple M central Queensland) discussed posts                                  | 206           |
| Occasional share of the updated information and resources to CQHHS staff through daily news and the weekly bulletin (Drift) | 4,800         |
| Occasional emails with updated information and resources to the personnel from partner organisations other than CQHHS       | 3,409         |

**Table 2(b). Numbers of partners and champions contacted, and numbers who supported the “10,000 Lives” initiative in first 26 months**

| Champions and partners                                                                                                              | Numbers  |
|-------------------------------------------------------------------------------------------------------------------------------------|----------|
| Clinical Staff were contacted (Identified as a Champion <sup>†</sup> )                                                              | 133 (7)  |
| Community Staff were contacted (Identified as a Champion <sup>†</sup> )                                                             | 26 (2)   |
| GP centres were contacted (Identified as a Champion <sup>†</sup> )                                                                  | 76 (1)   |
| Regional and local council staff were contacted (Actively supported <sup>‡</sup> )                                                  | 15 (6)   |
| Politicians including Minister, MP, Mayor, Councillors were contacted (Actively supported <sup>‡</sup> )                            | 24 (3)   |
| Number of the collaborating organisation (Active partner <sup>§</sup> )                                                             | 18 (15)  |
| Clinicians were encouraged smoking cessation masterclass training (training completed)                                              | 133 (70) |
| Number of students/teens registered for film competition (films developed)                                                          | 21 (6)   |
| Aboriginal and Torres Strait Islander volunteers trained for Brief intervention training by B.strong collaborated by “10,000 Lives” | 40       |

<sup>†</sup> **Champion:** The people or the unit who routinely worked for smoking cessation, kept regular communication with feedback to SPO of “10,000 Lives” of his smoking cessation activities.

<sup>‡</sup> **Actively supported:** Provided support and did advocacy for ‘10,000 lives’ initiative

<sup>§</sup> **Active partner:** Collaborated and worked together with “10,000 Lives” initiative

**Table 2(c). Monetary cost spent for “10,000 Lives” initiative in 24 months (January 2018-December 2019) after launch**

| Item of cost                                       | Amount in Australian Dollar |
|----------------------------------------------------|-----------------------------|
| Labour cost (human resource)                       | \$199,600.0                 |
| Non-labour cost (Materials, supplies, travel etc.) | \$16,984.0                  |
| Evaluation and research cost (PhD project)         | \$64,164.0                  |
| <i>Total</i>                                       | <i>\$ 280,748.0</i>         |

**Figure 3. Major strategies employed by “10,000 Lives” initiative**

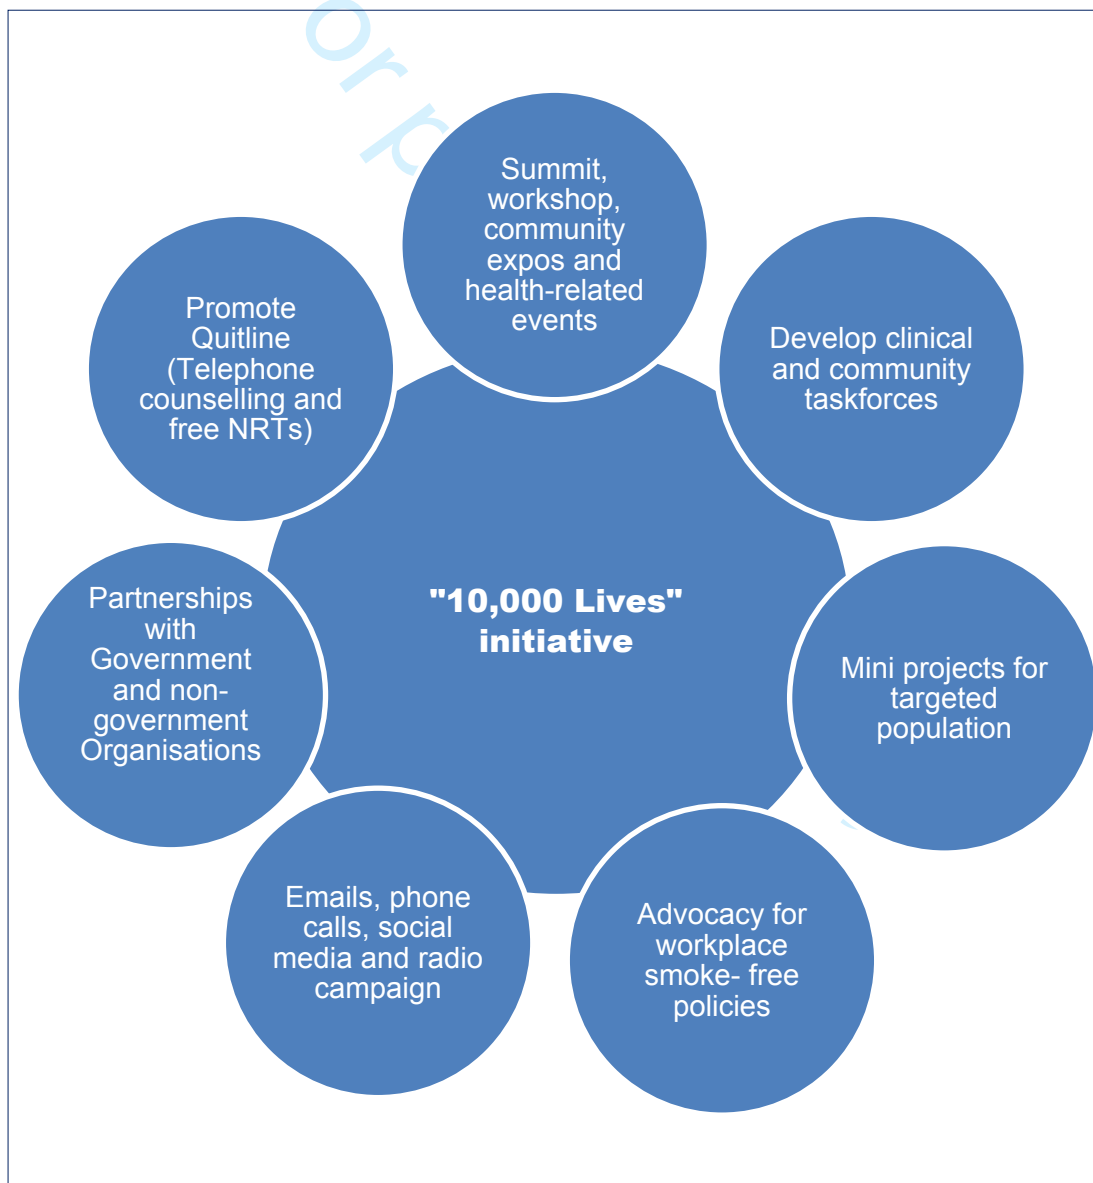

# BMJ Open

## How can a coordinated regional smoking cessation initiative be developed and implemented? A program logic model to evaluate the "10,000 Lives" health promotion initiative in Central Queensland, Australia

|                                 |                                                                                                                                                                                                                                                                                                                                                                                                                                                                                                                                                                                                                                                                                                                                                      |
|---------------------------------|------------------------------------------------------------------------------------------------------------------------------------------------------------------------------------------------------------------------------------------------------------------------------------------------------------------------------------------------------------------------------------------------------------------------------------------------------------------------------------------------------------------------------------------------------------------------------------------------------------------------------------------------------------------------------------------------------------------------------------------------------|
| Journal:                        | <i>BMJ Open</i>                                                                                                                                                                                                                                                                                                                                                                                                                                                                                                                                                                                                                                                                                                                                      |
| Manuscript ID                   | bmjopen-2020-044649.R1                                                                                                                                                                                                                                                                                                                                                                                                                                                                                                                                                                                                                                                                                                                               |
| Article Type:                   | Original research                                                                                                                                                                                                                                                                                                                                                                                                                                                                                                                                                                                                                                                                                                                                    |
| Date Submitted by the Author:   | 04-Feb-2021                                                                                                                                                                                                                                                                                                                                                                                                                                                                                                                                                                                                                                                                                                                                          |
| Complete List of Authors:       | Khan, Arifuzzaman; The University of Queensland Faculty of Medicine, School of Public Health; Central Queensland Hospital and Health Service, Public Health Unit<br>Green, Kalie ; Central Queensland Hospital and Health Service, Public Health Unit<br>Khandaker, Gulam; Central Queensland Hospital and Health Service, Public Health Unit; The University of Queensland Faculty of Medicine, School of Public Health<br>Lawler, Sheleigh; The University of Queensland Faculty of Medicine, School of Public Health<br>Gartner, Coral; The University of Queensland Faculty of Medicine, School of Public Health; The University of Queensland Faculty of Health and Behavioural Sciences, Queensland Alliance for Environmental Health Sciences |
| <b>Primary Subject Heading</b>: | Smoking and tobacco                                                                                                                                                                                                                                                                                                                                                                                                                                                                                                                                                                                                                                                                                                                                  |
| Secondary Subject Heading:      | Public health                                                                                                                                                                                                                                                                                                                                                                                                                                                                                                                                                                                                                                                                                                                                        |
| Keywords:                       | PUBLIC HEALTH, SOCIAL MEDICINE, PREVENTIVE MEDICINE, Health policy < HEALTH SERVICES ADMINISTRATION & MANAGEMENT                                                                                                                                                                                                                                                                                                                                                                                                                                                                                                                                                                                                                                     |
|                                 |                                                                                                                                                                                                                                                                                                                                                                                                                                                                                                                                                                                                                                                                                                                                                      |

SCHOLARONE™  
Manuscripts

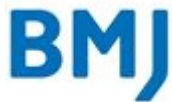

I, the Submitting Author has the right to grant and does grant on behalf of all authors of the Work (as defined in the below author licence), an exclusive licence and/or a non-exclusive licence for contributions from authors who are: i) UK Crown employees; ii) where BMJ has agreed a CC-BY licence shall apply, and/or iii) in accordance with the terms applicable for US Federal Government officers or employees acting as part of their official duties; on a worldwide, perpetual, irrevocable, royalty-free basis to BMJ Publishing Group Ltd ("BMJ") its licensees and where the relevant Journal is co-owned by BMJ to the co-owners of the Journal, to publish the Work in this journal and any other BMJ products and to exploit all rights, as set out in our [licence](#).

The Submitting Author accepts and understands that any supply made under these terms is made by BMJ to the Submitting Author unless you are acting as an employee on behalf of your employer or a postgraduate student of an affiliated institution which is paying any applicable article publishing charge ("APC") for Open Access articles. Where the Submitting Author wishes to make the Work available on an Open Access basis (and intends to pay the relevant APC), the terms of reuse of such Open Access shall be governed by a Creative Commons licence – details of these licences and which [Creative Commons](#) licence will apply to this Work are set out in our licence referred to above.

Other than as permitted in any relevant BMJ Author's Self Archiving Policies, I confirm this Work has not been accepted for publication elsewhere, is not being considered for publication elsewhere and does not duplicate material already published. I confirm all authors consent to publication of this Work and authorise the granting of this licence.

1  
2  
3  
4 **How can a coordinated regional smoking cessation initiative be developed and**  
5 **implemented? A program logic model to evaluate the “10,000 Lives” health promotion**  
6 **initiative in Central Queensland, Australia**  
7  
8  
9

10 Arifuzzaman Khan<sup>1,2</sup>, Kalie Green<sup>2</sup>, Gulam Khandaker<sup>1,2\*</sup>, Sheleigh Lawler<sup>1</sup>, Coral Gartner<sup>1,3</sup>

- 12 1. School of Public Health, Faculty of Medicine, The University of Queensland,  
13 Australia
- 14 2. Central Queensland Public Health Unit, Central Queensland Hospital and Health  
15 Service, Australia
- 16 3. Queensland Alliance for Environmental Health Sciences, Faculty of Health and  
17 Behavioural Sciences, The University of Queensland, Australia

22  
23  
24 **\*Corresponding Author:**

25 Professor Gulam Khandaker MBBS, MPH, DCH, PhD, FAFPHM

26 Address: Director of Public Health, Central Queensland Hospital and Health Service  
27 Rockhampton Community Health, 82-86 Bolsover Street, Rockhampton, QLD, 4700,  
28 Australia.

29 E-mail: Gulam.Khandaker@health.qld.gov.au

30 Phone: +61749206989, Fax: +617-4920 6865

31  
32  
33  
34  
35  
36 **Keywords**

37 Smoking cessation, process evaluation, health promotion, regional health planning.  
38  
39  
40  
41  
42  
43  
44  
45  
46  
47  
48  
49  
50  
51  
52  
53  
54  
55  
56  
57  
58  
59  
60

## **Abstract:**

### ***Objective***

This study utilised a program logic model to describe the inputs, activities and outputs of the “10,000 Lives” smoking cessation initiative in Central Queensland, Australia

### ***Design***

A program logic model provided the framework for the process evaluation of “10,000 Lives”. The data were collected through document review, observation and key informant interviews, and subsequently analysed after coding and re-coding into classified themes, inputs, activities and outputs.

### ***Setting***

The prevalence of smoking is higher in the Central Queensland region of Australia compared to the national and state averages. In 2017, Central Queensland Hospital and Health Services set a target to reduce the percentage of adults who smoke from 16.7% to 9.5% in the Central Queensland region by 2030 as part of their strategic vision (‘Destination 2030’). Achieving this target is equivalent to 20,000 fewer smokers in Central Queensland, which should result in 10,000 fewer premature deaths due to smoking-related diseases. To translate this strategic goal into an actionable smoking-cessation initiative, the “10,000 Lives” health promotion program was officially launched on 1 November 2017.

### ***Result***

The activities of the initiative coordinated by a senior project officer included building clinical and community taskforces, organising summits and workshops, and regular communications to stakeholders. Public communication strategies (e.g., Facebook, radio, community exhibitions of “10,000 Lives”, and health-related events) were utilised to promote available smoking cessation support to the Central Queensland community.

### ***Conclusion***

The “10,000 Lives” initiative provides an example of a coordinated health promotion program to increase smoking cessation in a regional area through harnessing existing resources and strategic partnerships (e.g., Quitline). Documenting and describing the process evaluation of

1  
2  
3 the “10,000 Lives” model is important so that it can be replicated in other regional areas with  
4 a high prevalence of smoking.  
5  
6

### 7 **Strengths and limitations of this study**

- 8  
9  
10
- 11 • The study considered a standard evaluation framework (logic model) to describe the  
12 program.  
13
  - 14 • Multiple sources of data were collected and included to describe the process of the  
15 program  
16
  - 17 • The plan for impact evaluation of the program is discussed in the article.  
18
  - 19 • Some outputs may have been omitted due to lack of systematic documentation of all  
20 activities within the project field notes.  
21  
22  
23  
24  
25  
26  
27  
28  
29  
30  
31  
32  
33  
34  
35  
36  
37  
38  
39  
40  
41  
42  
43  
44  
45  
46  
47  
48  
49  
50  
51  
52  
53  
54  
55  
56  
57  
58  
59  
60



## Introduction

Tobacco smoking remains the leading avoidable risk factor that contributes to the burden of death and disease in Australia. The 2015 Australian Burden of Disease Study estimated that 9.3% of the total disease burden, 13.3% of all deaths, and 443,235 Disability Adjusted Life Years (DALYs) were related to tobacco use.<sup>1,2</sup> In Queensland, the northeast state of Australia, leading causes of deaths are lung cancer, COPD, coronary heart diseases, which have a strong link with tobacco smoking.<sup>3</sup> In 2016, 12% of the adult population were daily smokers in Australia,<sup>4</sup> whereas 14.5% of adults in Queensland,<sup>5</sup> and 16.7% of adults in Central Queensland (the central regional district of Queensland) smoked daily.<sup>6</sup> Central Queensland (CQ) had the fourth-highest smoking prevalence among all 15 hospital and health services catchment regions in Queensland; South West (inner regional area) had the highest (21.6%) and the Sunshine Coast (close to the capital city, Brisbane) had the lowest rate (10.3%).<sup>7</sup> Reasons for the higher smoking prevalence in CQ may include the higher proportion of the population who experience socioeconomic disadvantage, compared to the state average.<sup>7,8</sup> Priority populations for smoking cessation assistance identified within CQ include pregnant women (17.0% smoking prevalence),<sup>9</sup> Aboriginal and/or Torres Strait Islander peoples (Australia's Indigenous people groups),<sup>5</sup> and people living in particular local government areas within CQ, such as Gladstone 19.1% and Rockhampton 17.7% smoking prevalence.<sup>7,8</sup>

Tobacco control and smoking cessation programs are a shared responsibility between the Federal Government and the States and Territories in Australia.<sup>10</sup> The State and Territory governments implement many tobacco control and smoking cessation programs. Queensland has performed as one of the best states in Australia for tobacco control activities in recent years.<sup>11</sup> The daily smoking rate in Queensland declined from 17.9% in 2002 to 10.3% in 2020.<sup>12</sup> Programs and policies delivered by the Queensland Government including the Quitline service<sup>13</sup>, anti-smoking mass media campaigns, and smoke-free policies and laws have together contributed to maintaining a downward trend in the daily smoking rate in Queensland over the last few decades.<sup>14</sup> However, a significantly higher rate of adult smoking than the state average has persisted in some regional areas like the CQ region.<sup>9</sup> This might be due to a higher baseline smoking prevalence and sub-optimal use of available interventions (e.g., Quitline) by the regional and rural people who smoke (Quitline monthly data, 2014-2019).

The higher prevalence of smoking in CQ compared with the whole of Queensland led Central Queensland Hospital and Health Service (CQHHS) to prioritise smoking cessation while

1  
2  
3  
4  
5  
6  
7  
8  
9  
10  
11  
12  
13  
14  
15  
16  
17  
18  
19  
20  
21  
22  
23  
24  
25  
26  
27  
28  
29  
30  
31  
32  
33  
34  
35  
36  
37  
38  
39  
40  
41  
42  
43  
44  
45  
46  
47  
48  
49  
50  
51  
52  
53  
54  
55  
56  
57  
58  
59  
60

formulating the region's strategic health vision (known as 'Destination 2030') through a six month consultation process with CQ health personnel, consumers, priority groups, and community partners.<sup>15</sup> As part of 'Destination 2030',<sup>15</sup> CQHHS set a goal to reduce the adult daily smoking prevalence from 16.7% to 9.5% in CQ by 2030. Accomplishing this goal would be equivalent to 20,000 fewer smokers in CQ which was estimated to result in 10,000 lives that would be saved from premature death due to smoking-related diseases because half of all long-term-smokers die from a smoking related disease.<sup>16</sup> The strategic goal was translated into an actionable health promotion initiative to increase smoking cessation, which was named "10,000 Lives".<sup>17</sup> The name of the "10,000 Lives" initiative builds on the previously highly successful "10,000 Steps Rockhampton" program, which promoted physical activity in Rockhampton.<sup>18,19</sup> The popularity of "10,000 Steps Rockhampton" helped branding "10,000 Lives" and increasing recognition of the program among the partners and the community. Besides, the lesson learned from the process evaluation of "10,000 Steps Rockhampton" assisted us to develop a working model for achieving the goals of the "10,000 Lives" initiative.<sup>18,19</sup>

Tobacco control and smoking cessation are priorities of federal and state governments (e.g., Queensland) in Australia, yet, there are always budget constraints for preventive health promotion.<sup>20</sup> As such it is imperative to consider how to leverage off existing funded programs with small iterative changes and budget. A low-cost and locally initiated program like "10,000 Lives" is one such example, where this principle is being applied, with the aim of improving the health and wellbeing of the community. Completing a process evaluation of "10,000 Lives" was undertaken so that others can benefit from the shared learning experience, and to identify elements that were implemented well and which were less successful and could be improved. Process evaluations of the national campaign for smoking cessation in Australia are documented rigorously.<sup>21-25</sup> Some targeted smoking cessation campaigns have been evaluated for their impact and outcomes.<sup>26,27</sup> However, we could not find any similar evaluations of smoking cessation programs that used a logic model in the scientific literature. This paper documents the process evaluation of "10,000 Lives" so that researchers, health professionals and policy makers can use this information for future program planning.

## Aim

This study aims to describe the inputs (planning, resources and costs, and partners), activities and outputs of the "10,000 Lives" initiative of Central Queensland, Australia.

## Method

An evaluation plan was formulated to investigate the inputs, activities, outputs, impact and outcome of the “10,000 Lives” initiative. A program logic model, adapted from a standard health promotion evaluation framework,<sup>20</sup> was developed for the evaluation plan. The evaluation framework was discussed among stakeholders who attended the “10,000 Lives” summit in Rockhampton, Australia, in November 2018. We have chosen this model because this has guided understanding the program input for “10,000 Lives” but also the program evaluation, where process, impact and outcome assessment can be clearly delineated (**Figure 1**). However, this paper focuses on describing the inputs (planning, resources and cost, and partnership), activities and outputs of the initiative.

### *Target population of the “10,000 Lives” initiative*

The target population for the “10,000 Lives” initiative is all smokers living in the service catchment area of CQHHS (**Figure 2**), which includes 12 public hospitals in CQ.<sup>6</sup> In 2017, the population of the CQ region was ~220,000 people (4.5% of the Queensland population and 0.9% of the Australia population).<sup>28</sup> There were 54,722 families (74,201 households) in 2017; the median age was 34.9 years; sixty-five per cent of the population were aged between 15–64 years.<sup>29</sup> Approximately six per cent of the population are Aboriginal and/or Torres Strait Islanders (Australian Indigenous people).<sup>8</sup> The rate of smoking is higher among these population groups compared to the overall population due to the legacy of colonisation.<sup>30</sup> The rate of homelessness was 41.0 per 10,000 persons. The median total personal income per year was \$35,017 Australian dollars (AUD), with 50.2% having the highest level of schooling of Year 11 or 12 (or equivalent). In CQ, 25.7% of the population were in the most disadvantaged quintile and 10.1% of the population were in the least disadvantaged quintile, whereas in Queensland, 20% of the population were in most disadvantaged quintile and 20.0% in the least disadvantaged quintile in 2017.<sup>8</sup> Compared to the whole state of Queensland, CQ has a higher burden of the social determinants of poor health, including low-income households, early exit from school, unemployment and mental health issues. These socio-demographic factors contribute to the higher prevalence of smoking in this region.<sup>31</sup> According to a state-wide survey in the year preceding the launching of “10,000 Lives” an estimated ~28,000 adults who smoke resided in CQ.<sup>7</sup> The daily smoking prevalence was highest (17.4%) in the 30-44 years age group. Also, the prevalence was high (18.5%) among the most disadvantaged quintile.<sup>7</sup>

### *Study design, data collection and analysis*

1  
2  
3 We conducted an exploratory investigation by critically appraising the project plan, partnership  
4 development, communication strategies, targeted project activities and overall health  
5 promotion activities for smoking cessation covered by the “10,000 Lives” initiative. Data were  
6 collected retrospectively for the period between July 2017 (initiation of planning) up to  
7 December 2019 (26 months after the official launch of “10,000 Lives”) from field notes,  
8 project documentation notes, relevant policy documents, and key informant interviews with  
9 project personnel.

10  
11  
12 A generic search was performed of relevant websites (i.e., Queensland Health:  
13 [www.health.qld.gov.au](http://www.health.qld.gov.au), CQ Health: [www.health.qld.gov.au/cq](http://www.health.qld.gov.au/cq), Department of Health of  
14 Australian Government: [www.health.gov.au](http://www.health.gov.au), and Australian Institute of Health and Welfare:  
15 [www.aihw.gov.au](http://www.aihw.gov.au)) for relevant policy documents, and social media pages (e.g., Facebook) for  
16 information about smoking cessation campaigns active during the study timeframe.

17  
18  
19 Data were extracted from these sources and imported into NVIVO,<sup>32</sup> and then cleaned, coded,  
20 and classified into five themes: plans, resources and cost, partnerships, activities and outputs. A  
21 narrative synthesis and summary interpretation was completed and these are presented in the  
22 results section. The data sources and collection methods are shown in **Table 1**.

### 23 24 25 *Ethical approval*

26  
27  
28 The study was approved by CQHHS Human Research Ethics Committee (HREC)  
29 (HREC/2019/QCQ/50602).

### 30 31 32 *Patient and Public involvement*

33  
34  
35 We used routine data source for process evaluation of the program. Individual participants were  
36 not involved in this study.

## 37 38 39 **Result**

40  
41  
42 **Table 2** lists the key findings about the inputs (planning, resources and cost, and partnerships),  
43 activities and outputs of the “10,000 Lives” initiative in first 26 months after its launch. Below,  
44 we described the result according to the findings from different parts of the logic model  
45 framework (i.e., Inputs, Activities and Outputs).

### 46 47 48 *Input: Planning*

49  
50  
51 At the program planning stage (July-August 2017), Central Public Health Unit (CQPHU), with  
52 the help of the Service Integration Coordinator of the CQ Mental Health Alcohol and Other  
53

1  
2  
3 Drugs Services, developed a project proposal to establish a smoking cessation taskforce in CQ.  
4  
5 The project proposal<sup>33</sup> stated the objectives of the initiative as:

6  
7 “1. *Establish a 10,000 Lives Taskforce: The taskforce will form the backbone of the project*  
8 *and through collective impact with the support of a wide range of community stakeholders*  
9 *large scale social change will be achieved. (“Collective impact” is a structured and disciplined*  
10 *approach to bringing cross-sector organisations together to focus on a common agenda that*  
11 *result in long-lasting improvement.).*

12  
13  
14  
15  
16 2. *Establish a team of clinical champions to engage key stakeholders e.g. G.P.’s and provide*  
17 *health promotion activities, intervention and education to the broader community”.*

18  
19  
20  
21 The aim was subsequently reflected in ‘Destination 2030’.<sup>15</sup> The initial plan considered  
22 strategies that adhered to the following guiding principles: i) *Population approach* of  
23 delivering a sustained, effective and comprehensive initiative for all, ii) *Whole system*  
24 *approach* of harnessing the many inter-related factors that can contribute to improving health  
25 and wellbeing, iii) *Evidence-based approach* of integrating knowledge from research evidence  
26 into implementation (e.g., evidence review of effective smoking cessations and partnership  
27 with academic institute for process evaluation), iv) *Reducing inequality* by addressing the  
28 differences in health status in the community through recognising and responding to the  
29 vulnerable groups (e.g. the groups who have higher smoking prevalence), v) *Working in*  
30 *partnership* with government departments, community members, Non-Government  
31 Organisations (NGOs), and academic stakeholders, vi) *Building capacity* by developing an  
32 adequate number of skilled and empowered people, and vii) *Effective implementation and*  
33 *evaluation* for ensuring the platform to track the collective impact.<sup>33</sup> For implementing the  
34 approaches, multiple and specific mini-projects were planned to target priority groups. For  
35 example, plans were formulated to give more attention to specific geographical areas (e.g.,  
36 Gladstone and Woorabinda) and populations (e.g., mine workers and Aboriginal and Torres  
37 Strait Islander people) since the higher rate of smoking were observed among these  
38 populations. Ambitious milestones were set during program planning including a reduction of  
39 ~3,000 smokers by 2020’, ‘a reduction of ~14,000 smokers by 2025’ and ‘a reduction of  
40 ~20,000 smokers by 2030’.<sup>33</sup>

#### 41 42 43 44 45 46 47 48 49 50 51 52 53 54 55 56 ***Input: Resources and costs***

57  
58 A senior project officer (SPO, Administrative Officer Grade 5) was recruited in December  
59 2017 to coordinate the planned activities and manage the implementation of the program  
60

1  
2  
3 strategies. Other resources utilised in the project included communication materials (e.g.,  
4 Posters and leaflets, emails, news, website and social media content), promotion materials (e.g.,  
5 information containing postcards, coffee cups, fridge magnets, water bottles and bags),  
6 materials required for mobile stalls to display the project activities in community or health  
7 events (e.g., display table, carbon monoxide breath testing for smokers), organising summits  
8 and workshops, and ground signage. The approximate cost for running the program for 24  
9 months (January 2018-December 2019) was \$280,748 (AUD) including the amount \$64,164  
10 (AUD) for the research and evaluation component (**Table 2(a)**). The initiative was approved  
11 by the CQHHS board and solely funded by CQHHS.

12  
13  
14  
15  
16  
17  
18  
19 In addition to the direct resource and costs, the initiative utilised in-kind support from the  
20 CQPHU for administrative activities including administration staff support and operational  
21 support during the period between starting the program planning in July 2017 and the official  
22 launch of the initiative in November 2017. Also, the initiative utilised the existing resources  
23 available for smoking cessation in CQ which included combination of a 12-weeks-free  
24 Nicotine Replacement Therapies (NRTs) and telephone counselling via the Queensland  
25 Quitline's Intensive Quit Support Program, subsidised smoking cessation pharmacotherapies  
26 through the Pharmaceutical Benefits Scheme, Queensland Health's Quality Improvement  
27 Payment (an incentive program for clinicians), and the collaborative support from existing  
28 smoking cessation programs (i.e., "Quit for You...Quit for Baby", "Quit for You", "Yarn to  
29 Quit", B.strong).

### 30 ***Input: Partnerships***

31  
32  
33  
34  
35  
36  
37  
38  
39  
40  
41  
42  
43  
44  
45  
46  
47  
48  
49  
50  
51  
52  
53  
54  
55  
56  
57  
58  
59  
60  
Developing partnerships and involving stakeholders in the implementation of "10,000 Lives"  
was a key strategy of the initiative. A strategic partnership was made with the Queensland  
Quitline<sup>13</sup> for enhancing the promotion of their existing Intensive Quit Support Program which  
was available to rural, regional and remote communities with a higher than average smoking  
prevalence and accessing a monthly report to track Quitline registrations and participation  
status for smokers in CQ. Extensive in-kind support was provided by the Board and Chief  
Executive of CQHHS by arranging the project fund, and the Preventive Health Branch of  
Queensland Health by giving strategic advice and advocacy for implementing the smoke-free  
policies. Partnerships were built with different units and programs within CQHHS (e.g., Oral  
health, Mental health, 'CQ Youth Connect'), community organisations (e.g., Rotary<sup>34</sup>), a  
foundation for youth mental health called 'Headspace',<sup>35</sup> a targeted brief intervention training

1  
2  
3 program for Aboriginal and/or Torres Strait Islander people named ‘B.strong’,<sup>36</sup> a health  
4 promotion initiative for Aboriginal and/or Torres Strait Islander people called ‘Deadly  
5 Choices’,<sup>37</sup> local councils (city council and local government staff) and a non-government  
6 organisation (NGO) supporting and developing businesses and projects in CQ called  
7 “Capricorn Enterprise”<sup>38</sup> to promote and support smoking cessation activities for their staff and  
8 client population (patient, youth, community and Aboriginal and/or Torres Strait Islander  
9 people who smoke). The project collaborated with the University of Queensland for academic  
10 support for the program evaluation. Partnerships were developed with “Cancer Council  
11 Queensland”<sup>39</sup> for conducting training and workshops for the local clinicians, social workers  
12 and volunteers who were interested in supporting the initiative. The local Primary Health  
13 Network actively collaborated with “10,000 Lives” initiative by promoting the initiative’s  
14 interventions (e.g., referral to Quitline, smoking cessation advice to patients who smoke) to  
15 General Practitioners (GPs). Local sports clubs and radio stations also supported the initiative  
16 to promote the available smoking cessation interventions to their audience.  
17  
18  
19  
20  
21  
22  
23  
24  
25  
26  
27

### 28 *Activities*

29  
30 The SPO coordinated the activities of “10,000 Lives” under the guidance of the director of  
31 CQPHU. The SPO took a pre-set plan and continuously adapted strategies (described in  
32 planning section) for implementing the program. The following range of activities were  
33 delivered to increase smoking cessation in CQ:  
34  
35  
36

- 37 1. **Organising tobacco summits** to develop partnerships with clinicians, GPs, social  
38 workers, local council and industry staff, and local politicians.
- 39 2. **Establishing a clinical and community organisation taskforce for smoking cessation**  
40 to identify clinical and community organisation personnel to become a champion for  
41 smoking cessation. CQHHS clinicians were encouraged to conduct inpatient hospital and  
42 health care facility-based documentation and brief intervention<sup>a</sup> via a standardised  
43 ‘Smoking Cessation Clinical Pathway (SCCP)’<sup>40</sup> form among patients who smoke, and to  
44 refer them to Quitline for accessing the Intensive Quit Support Program. The SCCP is an  
45 evidence-based decision support tool for screening smoking status and delivering a brief  
46 intervention to patients for smoking cessation. Community champions were encouraged to  
47  
48  
49  
50  
51  
52  
53  
54  
55  
56

---

57  
58 <sup>a</sup> *Brief smoking cessation advice and referral embedded opportunistically into clinical*  
59 *practice.*  
60

1  
2  
3 promote the Quitline program and other smoking cessation support (e.g., My QuitBuddy  
4 app) to people who smoke.

- 5  
6  
7  
8  
9  
10  
11  
12  
13  
14  
15  
16  
17  
18  
19  
20  
21  
22  
23  
24  
25  
26  
27  
28  
29  
30  
31  
32  
33  
34  
35  
36  
37  
38  
39  
40
3. **Promoting smoking cessation** through emails, newsletters, local radio, social media pages (i.e., Facebook), digital billboard and ground signage, and exhibiting in various community expos and health-related events. The SPO explored various communication pathways to promote the available smoking cessation support, particularly the Quitline program. These included; conducting events on the local radio station ('Triple M'), posting messages on Facebook pages ("10,000 Lives", CQHHS and 'Triple M' Facebook pages), local newspapers (The Morning Bulletin and Gladstone Observer) and in the daily news and weekly bulletin of CQHHS and e-newsletters for GPs, and electronic billboard display in the center of the main city of the CQ region (i.e. Rockhampton CBD) (**Figure 3**).
  4. **Advocating for smoke-free policies and programs** that could support smokers to quit. For example, the initiative established the ground signage and delivered tear off flyers promoting Smoke-free Healthcare in each of the hospital and community health campuses of CQHHS.
  5. **Implementing mini-projects** to give extra attention to priority populations. For example, a film competition on 'smoke-free teens' was organised to deliver a youth-centric smoking cessation message designed by youth for youth, and a workshop was conducted by the SPO to introduce carbon monoxide breath monitors with *Gumma Gundoo Indigenous Maternal & Infant Care Outreach team*<sup>41</sup> to increase awareness of the adverse effects of antenatal smoking on mother and baby amongst Aboriginal and Torres Strait Islander pregnant women.

#### 41 **Outputs**

42  
43  
44 The quantitative output measures from the "10,000 Lives" activities are shown in **Table 2(b)**  
45 **and 2(c)**. Overall, the "10,000 Lives" initiative conducted seven smoking cessation summits  
46 and one Tackling Tobacco Forum, promoted and celebrated World No Tobacco Day  
47 regionally, completed at least twenty education sessions for newly recruited CQHHS staff, and  
48 conducted a combined smoking cessation workshop for the clinical and community champions.  
49 The SPO encouraged all the clinicians of CQHHS to attend the Smoking Cessation  
50 Masterclasses conducted by Queensland Health (Metro South HHS and Metro North HHS),  
51 with 70 clinicians completing, and a three-day training course on nicotine addiction and  
52 smoking cessation,<sup>42</sup> which was completed by six clinicians. Forty Aboriginal and/or Torres  
53 Strait Islander volunteers were trained in performing Brief Intervention for smoking cessation  
54  
55  
56  
57  
58  
59  
60



1  
2  
3 conducted by the Menzies School of Health Research (B.strong).<sup>36</sup> The “10,000 Lives”  
4 initiative was exhibited in twelve community expos and nine health-related events(e.g., World  
5 Cancer Day, World COPD day). The initiative implemented two mini-projects for priority  
6 population (Aboriginal and Torres Strait Islander pregnant women, younger people). “10,000  
7 Lives” collaborated with 15 different organisations including Hospital and Health Service,  
8 regional councils, University, Community Organisations and other initiatives to promote  
9 smoking cessation in CQ. The SPO shared updated resources and information about smoking  
10 cessation to ~3,400 staff of different partner organisations through emails and 4,800 staff of  
11 CQHHS through posting in the daily news and a weekly bulletin called ‘The Drift’. As a result  
12 of communication through email, phone call, posting messages and in-person meetings by the  
13 SPO, at least seven clinical champions, two community champions, two political champions  
14 and a champion GP centre became actively involved and worked on the ground as the smoking  
15 cessation taskforce in CQ.  
16  
17  
18  
19  
20  
21  
22  
23  
24  
25

## 26 Discussion

27  
28  
29 This article explains why and how the initiative was implemented, and describes the way it  
30 operated over the 26 month period following its official launch in November 2017. This study  
31 also outlines how success of the program will be measured.  
32  
33  
34

35 The “10,000 Lives” initiative was launched to reduce the daily smoking rate in CQ, which is  
36 higher than the state average. Policymakers realised the high disease burden that is due to  
37 smoking and included the ambitious aim to reduce the smoking rate to 9.5% by 2030 in the  
38 Destination 2030 plan. The implementing organisation of the initiative is the local Public  
39 Health Unit which explored the existing and available smoking cessation support available in  
40 its region. A number of effective tobacco control and smoking cessation interventions were  
41 already available in the region, and the “10,000 Lives” initiative aimed to increase awareness  
42 and uptake of these interventions. In this way, the initiative focused on maximising the use of  
43 existing services available in the region.  
44  
45  
46  
47  
48  
49  
50

51 The initial plan of the initiative was guided by the standard principles (described in the  
52 *Planning* part of the results section) of program implementation. The initiative was officially  
53 launched in each of the local government areas of CQ region at a Smoking Cessation Summit.  
54 Participation of the people from multiple sectors including Health and Community Services  
55 and state and local government in the inaugural summits ultimately facilitated the initiative to  
56  
57  
58  
59  
60

1  
2  
3 build the partnerships and identify champions. Partnerships with various government and non-  
4 government organisations opened and enhanced the opportunities to increase the coverage of  
5 workplace-based smoking cessation intervention (e.g., smoke-free policies, referrals to  
6 Quitline). Partnership with Quitline Queensland assisted the initiative to promote their  
7 intensive Quit support program among the partnering organisations (e.g., Hospitals, Councils,  
8 NGOs). Besides, the regular communication and motivation to the stakeholders (clinical and  
9 community champions) helped the SPO to identify the opportunities (e.g., arrange training and  
10 workshop on smoking cessation) and tackle the barriers of smoking cessation work for them.  
11 For example, if any champion talked about any organisational challenge to perform or promot  
12 smoking cessation, the SPO took initiative to escalate the issue to his/her supervisor and  
13 discussed to resolve the issue. While not all opportunities and barriers were able to be  
14 successfully resolved, a reasonable proportion (~32 %) led to successful outcomes (**Table**  
15 **2(c)**). These integral strategies of building partnerships and communication became useful to  
16 build a clinical and a community taskforce of smoking cessation in CQ which leveraged the  
17 existing smoking cessation program and policies available in the region. This approach is an  
18 exemplar of running a health promotion campaign in a resource constrained environment.  
19  
20  
21  
22  
23  
24  
25  
26  
27  
28  
29  
30  
31

32 The 10,000 “Lives” initiative was built on the success of a previous health promotion campaign  
33 “10,000 Steps Rockhampton” in this region.<sup>18,19</sup> The Rockhampton area was chosen for  
34 “10,000 Steps Rockhampton” program because of the high prevalence of obesity.<sup>18</sup> Again,  
35 “10,000 Lives” initiative was launched in CQ to address the higher prevalence of smoking in  
36 this region. The “10,000 Lives” utilised the program strategies (e.g., media campaign,  
37 partnerships with clinicians, focusing on priority populations) that were also used in the  
38 “10,000 Steps Rockhampton” program.<sup>18</sup> Other similarities include the use of technology to  
39 measure exhaled carbon monoxide in “10,000 Lives” and pedometers in “10,000 Steps  
40 Rockhampton” to measure activity levels. The use of the carbon monoxide breath monitor  
41 provided a teaching moment to discuss the health impacts of smoking by demonstrating the  
42 person’s exposure to one of the toxins in cigarette smoke, leading to increased autonomous-  
43 motivation to quit smoking . Creating autonomous motivation in people who smoke, explained  
44 by the ‘Self-Determination Theory’,<sup>43</sup> is effective for promoting smoking cessation.<sup>44</sup>  
45  
46  
47  
48  
49  
50  
51  
52  
53  
54

55 However, the implementation of the program was sometimes challenging, such as increasing  
56 clinician participation in delivering brief smoking cessation advice and Quitline referrals. Some  
57 stakeholders expected “10,000 Lives” to directly deliver smoking cessation services. Future  
58  
59  
60

1  
2  
3 program planning may need to think about how cost-effective and tailored services can be  
4 incorporated in the smoking initiative like “10,000 Lives”. The “10,000 Lives” initiative is  
5 quite different from other smoking cessation programs in Australia (e.g., B.strong, Quitline)  
6 which deliver smoking cessation assistance. Rather, “10,000 Lives” intended to increase  
7 motivation to quit, and raise awareness of existing smoking cessation assistance that is  
8 available via these other programs. While the National Tobacco Campaign <sup>21</sup> and statewide  
9 anti-smoking campaigns primarily use paid advertisement to disseminate the quit smoking  
10 message, the “10,000 Lives” program focused on low cost and targeted approaches to  
11 disseminating the quit smoking message via partnerships with local media and local clinical  
12 and community champions for promoting the smoking cessation interventions. This model has  
13 also been used in other health promotion programs implemented in New South Wales,  
14 Australia and in a community of North East England.<sup>45,46</sup>

15  
16  
17  
18  
19  
20  
21  
22  
23  
24  
25 The strategies for achieving the goal of the “10,000 Lives” initiative reflect ecological models  
26 of health promotion’ which explain the multiple levels of influence on health behaviour. <sup>47</sup> The  
27 initiative put substantial efforts to increase the use of interventions of smoking cessation  
28 programs by involving the service providers in the community (e.g., clinicians, NGO  
29 personnel) such this is a ‘downstream’ approach. For example, the “10,000 Lives” initiative  
30 encouraged clinicians to deliver brief interventions with their patients and refer them to  
31 Quitline, and other relevant smoking cessation programs. The use of local radio, which  
32 involved sports stars discussing smoking cessation and posting messages on Facebook pages  
33 are examples of ‘midstream’ strategies. While the advocacy of state level policies and programs  
34 (e.g., smoke-free hospitals) are ‘upstream’ strategies. Thus the “10,000 Lives” program fits  
35 the multi-level population based health promotion model of McKinlay.<sup>48</sup>

36  
37  
38  
39  
40  
41  
42  
43  
44  
45 The current study had some limitations. Some outputs may have been missed due to lack of  
46 documentation of all activities within the project field notes. Reporting the process of a  
47 program through a specific model might limit the information reported, therefore we used a  
48 standard health promotion evaluation framework to increase rigour. Achievements of the  
49 “10,000 Lives” program include the formation of a tobacco control alliance with health  
50 professionals, local authorities, communities and the media in CQ, dissemination of knowledge  
51 to health professionals on how to deliver brief interventions, distributed promotional material  
52 that raised the profile of smokefree policies and smoking cessation support available in CQ,  
53 and conducted events and local campaigns to increase awareness of smoking cessation among  
54  
55  
56  
57  
58  
59  
60

1  
2  
3 the general community and specific priority populations. The immediate and short- term  
4 impacts of the “10,000 Lives” initiative assessed via a stakeholder survey and analysis of  
5 Quitline data will be reported in detail elsewhere. However, we found good responses from the  
6 stakeholders in sharing their experience, role and recommendation for the continuation of the  
7 initiative. Our analysis of Quitline data indicated a significant positive impact of the  
8 introduction of “10,000 Lives” in CQ on referrals calls and use of Quitline services in  
9 comparison to a comparable control group.

## 16 **Conclusion**

17  
18 The “10,000 Lives” is an example of a health promotion program which coordinates smoking  
19 cessation activities in a regional area by harnessing and improving awareness of existing  
20 resources (e.g. employing only one project officer). Utilising existing resources and programs  
21 can be a cost-effective approach in countries like Australia where effective smoking cessation  
22 interventions are already widely available, but uptake is suboptimal. Evaluation of impact and  
23 outcome of this initiative could inform the development of future regional smoking cessation  
24 programs.

## 31 **Contributors**

32  
33 AK, GK, SL and CG conceived and designed the study. AK conducted the key informant  
34 interviews. AK and KG extracted the data from different sources. AK performed the analysis  
35 of the data. AK, KG, GK, SL and CG interpreted the results. AK drafted the manuscript and  
36 all authors contributed with critical revisions to the contents of the manuscript. The final  
37 version of the manuscript was approved by all authors.

## 43 **Acknowledgement**

44  
45 We acknowledge the unrestricted support from Central Queensland Public Health Unit, Central  
46 Queensland Hospital and Health Service, Preventive Health Branch and Quitline Services from  
47 Queensland Health (Queensland Government). We thank Caron Williams, the first senior  
48 project officer of the “10,000 Lives” program, and Susie Cameron, the service integration  
49 officer of CQ Mental Health Alcohol and Other Drugs Services, for sharing the project  
50 information through informal discussions and emails. Also, we thank Linda Medlin, Acting  
51 Director of Aboriginal and Torres Strait Islander Health and Wellbeing in Central Queensland  
52  
53  
54  
55  
56  
57  
58  
59  
60

1  
2  
3 Hospital and Health Service for her kind review of the manuscript in the perspective of cultural  
4 respectability.  
5

### 6 7 **Competing interests**

8  
9  
10 No, there are no competing interests for any author.  
11

### 12 13 **Funding**

14  
15  
16 The research is funded by the collaborative research grant between School of Public Health at  
17 University of Queensland and Central Queensland Public Health Unit which is awarded by  
18 the Central Queensland Hospital and Health Service (CQHHS93907).  
19  
20

### 21 22 **Data sharing statement**

23  
24  
25 No additional data available.  
26

### 27 28 **Patient Consent for Publication**

29  
30 Not applicable.  
31  
32  
33  
34  
35  
36  
37  
38  
39  
40  
41  
42  
43  
44  
45  
46  
47  
48  
49  
50  
51  
52  
53  
54  
55  
56  
57  
58  
59  
60

## References:

1. Australian Institute of Health and Welfare. Australian Burden of Disease Study 2015: Interactive data on risk factor burden. 2019; <https://www.aihw.gov.au/reports/burden-of-disease/interactive-data-risk-factor-burden/contents/tobacco-use>. Accessed 17/06/2019.
2. Data tables: ABDS 2015 Risk factors estimates. 2019. <https://www.aihw.gov.au/getmedia/28658401-d7f2-4e93-bb6f-9cbd2d5fa64c/ABDS-2015-Risk-factor-data.xlsx.aspx>.
3. Queensland Health. Full 2020 Chief Health Officer report. 2020; 29. Available at: <https://www.health.qld.gov.au/research-reports/reports/public-health/cho-report/current/full>.
4. Australian Bureau of Statistics (ABS). National Health Survey: First Results, 2017-18, cat. no. 4364.0.55.001. Released at 11:30 AM (CANBERRA TIME) 07/02/2019 2018; <http://www.abs.gov.au/ausstats/abs@.nsf/Lookup/by%20Subject/4364.0.55.001~2017-18~Main%20Features~Smoking~85>. Accessed 30/8/2019.
5. Queensland Health. . The health of Queenslanders 2016. Report of the Chief Health Officer Queensland. Queensland Government. 2016; <https://www.publications.qld.gov.au//dataset/chief-health-officer-reports>. Accessed 07/08/2019.
6. Queensland Government. Central Queensland Hospital and Health Service. 2016; <https://www.health.qld.gov.au/cq>. Accessed 26/01/2019, 2019.
7. Queensland Health. Detailed Queensland and regional preventive health survey results. *Preventive health surveys* 2019; <https://www.health.qld.gov.au/research-reports/population-health/preventive-health-surveys/detailed-data#documentation>. Accessed 29/08/2019.
8. Queensland Regional Profiles. Queensland Government; 2019. <https://statistics.qgso.qld.gov.au/qld-regional-profiles>. Accessed 29/07/2019.
9. Queensland Health. *The Health of Queenslanders 2018. Report of the Chief Health Officer Queensland; Hospital and Health Service profiles*. 2018.
10. Australian Government the Department of Health. National Tobacco Strategy. 2018; <https://www1.health.gov.au/internet/main/publishing.nsf/Content/tobacco-strategy>. Accessed 07/08/2019.
11. AUSTRALIAN COUNCIL ON SMOKING AND HEALTH. National Tobacco Control Scoreboard. 2019; <https://www.acosh.org/what-we-do/national-tobacco-control-scoreboard/>. Accessed 04/06/2020.
12. Queensland Health. Queensland trends. 2020; <https://www.health.qld.gov.au/researchreports/population-health/preventive-health-surveys/data-trends> Accessed 27 January 2021.
13. Queensland Health. Where Quitters Click. 2019; <https://www.health.qld.gov.au/news-alerts/campaigns/tobacco/where-quitters-click-campaign>. Accessed 08/08/2019.
14. Queensland Health. Smoking Prevention Strategy 2017 to 2020. 2017; [https://www.health.qld.gov.au/\\_data/assets/pdf\\_file/0022/651802/health-wellbeing-strategic-framework-smoking.pdf](https://www.health.qld.gov.au/_data/assets/pdf_file/0022/651802/health-wellbeing-strategic-framework-smoking.pdf). Accessed 04/06/2020.
15. Central Queensland Hospital and Health Services. Destination 2030. 2017; [https://www.health.qld.gov.au/\\_data/assets/pdf\\_file/0037/669772/destination-2030-full.pdf](https://www.health.qld.gov.au/_data/assets/pdf_file/0037/669772/destination-2030-full.pdf). Accessed 08/08/2019.
16. World Health Organization (WHO). Tobacco. 2019; <https://www.who.int/news-room/fact-sheets/detail/tobacco>. Accessed 05/08/2019, 2019.
17. Queensland Health. 10000 Lives CQ Smoking Cessation Project. 2020; <https://clinicalexcellence.qld.gov.au/improvement-exchange/10000-lives-cq-smoking-cessation-project>. Accessed 08/05/2020.

- 1
  - 2
  - 3
  - 4
  - 5
  - 6
  - 7
  - 8
  - 9
  - 10
  - 11
  - 12
  - 13
  - 14
  - 15
  - 16
  - 17
  - 18
  - 19
  - 20
  - 21
  - 22
  - 23
  - 24
  - 25
  - 26
  - 27
  - 28
  - 29
  - 30
  - 31
  - 32
  - 33
  - 34
  - 35
  - 36
  - 37
  - 38
  - 39
  - 40
  - 41
  - 42
  - 43
  - 44
  - 45
  - 46
  - 47
  - 48
  - 49
  - 50
  - 51
  - 52
  - 53
  - 54
  - 55
  - 56
  - 57
  - 58
  - 59
  - 60
18. Brown WJ, Eakin E, Mummery K, Trost SG. 10,000 Steps Rockhampton: Establishing a multi-strategy physical activity promotion project in a community. *Health Promotion Journal of Australia*. 2003;14(2):95-100.
19. Wendy JB, Kerry M, Elizabeth E, Grant S. 10,000 Steps Rockhampton: Evaluation of a Whole Community Approach to Improving Population Levels of Physical Activity. *Journal of Physical Activity and Health*. 2006;3(1):1-14.
20. Jackson H, Shiell A. *Preventive health: How much does Australia spend and is it enough?*. Canberra 2017.
21. Hill D, Carroll T. Australia's national tobacco campaign. *Tobacco Control*. 2003;12(suppl 2):ii9-ii14.
22. Carroll T, Rock B. Generating Quitline calls during Australia's National Tobacco Campaign: effects of television advertisement execution and programme placement. *Tob Control*. 2003;12 Suppl 2:ii40-44.
23. Cotter T, Perez DA, Dessaix AL, Bishop JF. Smokers respond to anti-tobacco mass media campaigns in NSW by calling the Quitline. *New South Wales public health bulletin*. 2008;19(3-4):68-71.
24. Miller CL, Wakefield M, Roberts L. Uptake and effectiveness of the Australian telephone Quitline service in the context of a mass media campaign. *Tob Control*. 2003;12 Suppl 2:ii53-58.
25. Kmietowicz Z. Plain tobacco packaging in Australia increases calls to Quitline. *BMJ : British Medical Journal*. 2014;348:g1646.
26. Power J, Grealy C, Rintoul D. Tobacco interventions for Indigenous Australians: a review of current evidence. *Health Promotion Journal of Australia*. 2009;20(3):186-194.
27. Walker RC, Graham A, Palmer SC, Jagroop A, Tipene-Leach DC. Understanding the experiences, perspectives and values of indigenous women around smoking cessation in pregnancy: systematic review and thematic synthesis of qualitative studies. *International Journal for Equity in Health*. 2019;18(1):74.
28. Prevention and Population Health Branch 2010, Evaluation framework for health promotion and disease prevention programs, Melbourne, Victorian Government Department of Health. <https://www2.health.vic.gov.au/about/publications/policiesandguidelines/Evaluation-framework-for-health-promotion-and-disease-prevention-programs>. Accessed 10/12/2018.
29. Boykan R, Messina CR. A Comparison of Parents of Healthy Versus Sick Neonates: Is There a Difference in Readiness and/or Success in Quitting Smoking? *Hospital pediatrics*. 2015;5(12):619-623.
30. Lovett R, Thurber KA, Maddox R. The Aboriginal and Torres Strait Islander smoking epidemic: what stage are we at, and what does it mean? *Public health research & practice*. 2017;27(4).
31. Leventhal AM, Bello MS, Galstyan E, Higgins ST, Barrington-Trimis JL. Association of Cumulative Socioeconomic and Health-Related Disadvantage With Disparities in Smoking Prevalence in the United States, 2008 to 2017. *JAMA Internal Medicine*. 2019;179(6):777-785.
32. QSR International. NVivo Qualitative Data Analysis Software [Software]. . 1999; <https://qsrinternational.com/nvivo/nvivo-products/>.
33. Central Queensland Hospital and Health Services. Project Plan: 10,000 Lives. In. Rockhampton, Queensland, Australia Central Queensland Public Health Unit; 2017:Page 2 of 16.
34. Rotary Club. Rotary Districts 9570, Central Queensland. <https://rotary9570.org/>. Accessed 05/05/2020.
35. Headspace. Headspace Rockhampton. <https://headspace.org.au/headspace-centres/rockhampton/>. Accessed 05-05-2020.
36. Menzies School of Health Researc. B.strong; Quit, Eat & Move for Health. <https://www.bstrong.org.au/>. Accessed 01/08/2019.

- 1  
2  
3 37. Deadly Choices. Deadly Choices. <https://deadlychoices.com.au/>.  
4 38. Capricorn enterprise. CAPRICORN ENTERPRISE. <https://capricornenterprise.com.au/>.  
5 Accessed 05-05-2020.  
6 39. Cancer Council Queensland. Cancer Council <https://cancerqld.org.au/>. Accessed 05-05-2020.  
7 40. De Guzman KR, Snoswell CL, Puljevic C, Gupta D. Evaluating the utility of a Smoking Cessation  
8 Clinical Pathway tool to promote nicotine prescribing and use among inpatients of a tertiary  
9 hospital in Brisbane, Australia. *Journal of Smoking Cessation*. 2020;15(4):214-218.  
10 41. Queensland Health. Gumma Gundoo Indigenous maternal and infant outreach. 2019;  
11 <https://www.health.qld.gov.au/cq/services/gumma-gundoo>. Accessed 06/05/2020.  
12 42. The Australasian Professional Society on Alcohol and other Drugs. NICOTINE ADDICTION &  
13 SMOKING CESSATION TRAINING COURSE. 2018; [https://www.apsad.org.au/news-a-](https://www.apsad.org.au/news-a-media/209-nicotine-addiction-smoking-cessation-training-course)  
14 [media/209-nicotine-addiction-smoking-cessation-training-course](https://www.apsad.org.au/news-a-media/209-nicotine-addiction-smoking-cessation-training-course). Accessed 20/3/2020.  
15 43. Deci EL, Ryan RM. Self-determination theory. In: *Handbook of theories of social psychology*,  
16 *Vol. 1*. Thousand Oaks, CA: Sage Publications Ltd; 2012:416-436.  
17 44. Williams GG, Gagné M, Ryan RM, Deci EL. Facilitating autonomous motivation for smoking  
18 cessation. *Health Psychology*. 2002;21(1):40-50.  
19 45. Campbell MA, Finlay S, Lucas K, Neal N, Williams R. Kick the habit: a social marketing campaign  
20 by Aboriginal communities in NSW. *Australian Journal of Primary Health*. 2014;20(4):327-333.  
21 46. McGeechan GJ, Woodall D, Anderson L, Wilson L, O'Neill G, Newbury-Birch D. A Coproduction  
22 Community Based Approach to Reducing Smoking Prevalence in a Local Community Setting.  
23 *Journal of environmental and public health*. 2016;2016:5386534.  
24 47. Promoting Health: Intervention Strategies from Social and Behavioral Research. *American*  
25 *Journal of Health Promotion*. 2001;15(3):149-166.  
26 48. McKinlay JB. The promotion of health through planned sociopolitical change: challenges for  
27 research and policy. *Social science & medicine (1982)*. 1993;36(2):109-117.  
28  
29  
30  
31  
32  
33  
34  
35  
36  
37  
38  
39  
40  
41  
42  
43  
44  
45  
46  
47  
48  
49  
50  
51  
52  
53  
54  
55  
56  
57  
58  
59  
60



**Table 1. Summary of data sources and collection method for each evaluation topic**

| Themes                                | Data sources                                                                                                                                   | Collection method                                                                          |
|---------------------------------------|------------------------------------------------------------------------------------------------------------------------------------------------|--------------------------------------------------------------------------------------------|
| <i>Inputs</i>                         |                                                                                                                                                |                                                                                            |
| Planning                              | Project planning documents and policy document 'Destination 2030'                                                                              | Document review and internet search                                                        |
| Resource                              | Project management documents                                                                                                                   | Document review                                                                            |
| Partnership                           | Project planning and management documents, Key informant interviews                                                                            | Document review, Key informant interviews                                                  |
| <i>Activities</i>                     |                                                                                                                                                |                                                                                            |
|                                       | Project management documents, Master file for project management, Key informant interviews, Working group documents, Websites and Social media | Document and content review, Websites, Social media, Observation, Key informant interviews |
| <i>Outputs</i>                        |                                                                                                                                                |                                                                                            |
|                                       | Project management documents, Master spread sheet, Stakeholders meeting documents, Attendance sheet, and Key informant interviews              | Document review, Key informant interviews                                                  |
| <i>Anticipated impact and outcome</i> |                                                                                                                                                |                                                                                            |
|                                       | Project management documents, Policy documents, Key informant interviews                                                                       | Project document review, Policy documents review, Key informant interviews                 |

**Table 2. Description of project planning, resources, partnerships, activities and outputs in first 26 months of project launched**

| Inputs                                                                                                                                                                                                                                                                                                                                                                                                                                                                                                                                                                                                                              |                                                                                                                                                                                                                                                                                                                                                                                                                                                                                                                                                                                                                                                                                           | Partnerships development                                                                                                                                                                                                                                                                                                                                                                                                                                                                                                                               | Activities                                                                                                                                                                                                                                                                                                                                                                                                                                                                                                                                                                                                                                         | Outputs                                                                                    |
|-------------------------------------------------------------------------------------------------------------------------------------------------------------------------------------------------------------------------------------------------------------------------------------------------------------------------------------------------------------------------------------------------------------------------------------------------------------------------------------------------------------------------------------------------------------------------------------------------------------------------------------|-------------------------------------------------------------------------------------------------------------------------------------------------------------------------------------------------------------------------------------------------------------------------------------------------------------------------------------------------------------------------------------------------------------------------------------------------------------------------------------------------------------------------------------------------------------------------------------------------------------------------------------------------------------------------------------------|--------------------------------------------------------------------------------------------------------------------------------------------------------------------------------------------------------------------------------------------------------------------------------------------------------------------------------------------------------------------------------------------------------------------------------------------------------------------------------------------------------------------------------------------------------|----------------------------------------------------------------------------------------------------------------------------------------------------------------------------------------------------------------------------------------------------------------------------------------------------------------------------------------------------------------------------------------------------------------------------------------------------------------------------------------------------------------------------------------------------------------------------------------------------------------------------------------------------|--------------------------------------------------------------------------------------------|
| Planning                                                                                                                                                                                                                                                                                                                                                                                                                                                                                                                                                                                                                            | Resources and Cost                                                                                                                                                                                                                                                                                                                                                                                                                                                                                                                                                                                                                                                                        |                                                                                                                                                                                                                                                                                                                                                                                                                                                                                                                                                        |                                                                                                                                                                                                                                                                                                                                                                                                                                                                                                                                                                                                                                                    |                                                                                            |
| <p><b>Aims and objectives</b></p> <ul style="list-style-type: none"> <li>Reducing smoking prevalence</li> <li>Saving lives from smoking-related deaths</li> </ul> <p><b>Strategies</b></p> <ul style="list-style-type: none"> <li>Establish a smoking cessation taskforce</li> </ul> <p><b>Guiding principle</b></p> <ol style="list-style-type: none"> <li>A Population approaches</li> <li>Whole system approach</li> <li>Evidence-based approach</li> <li>Reducing inequality</li> <li>Building capacity</li> <li>Building capacity</li> <li>Effective implementation and evaluation</li> </ol> <p><b>Pre-set milestones</b></p> | <p><b>Human resource</b></p> <ul style="list-style-type: none"> <li>One senior project officer</li> </ul> <p><b>Communication material</b></p> <ul style="list-style-type: none"> <li>Poster</li> <li>Leaflets</li> <li>Media documents (e.g., newsletter, Facebook pages)</li> </ul> <p><b>Promotion material</b></p> <ul style="list-style-type: none"> <li>Digital Billboard</li> <li>Ground Signage</li> <li>Information marked gift items (e.g. coffee mug, water bottle, bag, fridge magnets)</li> <li>Postcard</li> </ul> <p><b>Materials for exhibition</b></p> <ul style="list-style-type: none"> <li>Carbon monoxide breath monitor</li> <li>Poster</li> <li>Leaflet</li> </ul> | <p><b>Implementing intervention</b></p> <ul style="list-style-type: none"> <li>Quitline</li> <li>CQHHS</li> <li>Local community development service</li> <li>GP</li> <li>Headspace-works for Youth Mental Health; funded by Department of Health of the Australian Government</li> <li>Every child CQ-community service initiative- ,</li> <li>My Health for Life, B. strong)</li> </ul> <p><b>Advocacy</b></p> <ul style="list-style-type: none"> <li>Preventive Health Branch of Queensland Health</li> <li>Primary Health Network (PHN)-</li> </ul> | <p><b>Organised summit and forum</b></p> <ul style="list-style-type: none"> <li>Launched initiative</li> <li>Invited clinical, community and political partners</li> <li>Identified champions</li> </ul> <p><b>Developed taskforces</b></p> <ul style="list-style-type: none"> <li>Identified champions</li> <li>Repeated communication and motivation</li> <li>Identified opportunities</li> <li>Tackled barriers of work</li> <li>Advocated training and capacity development</li> </ul> <p><b>Campaigned and promoted smoking cessation interventions</b></p> <ul style="list-style-type: none"> <li>Newsletter</li> <li>Local radio</li> </ul> | <p><b>Numbers of different outputs are shown in below tables (Table 2(b) and 2(c))</b></p> |

1  
2  
3  
4  
5  
6  
7  
8  
9  
10  
11  
12  
13  
14  
15  
16  
17  
18  
19  
20  
21  
22

|                                                                                                                                                                                                                                                                       |                                                                                                                                                                                                                                                          |                                                                                                       |                                                                                                                                                                                                                              |                                                                                                                                                                                                                                                                                                                                                                                                                                                                  |
|-----------------------------------------------------------------------------------------------------------------------------------------------------------------------------------------------------------------------------------------------------------------------|----------------------------------------------------------------------------------------------------------------------------------------------------------------------------------------------------------------------------------------------------------|-------------------------------------------------------------------------------------------------------|------------------------------------------------------------------------------------------------------------------------------------------------------------------------------------------------------------------------------|------------------------------------------------------------------------------------------------------------------------------------------------------------------------------------------------------------------------------------------------------------------------------------------------------------------------------------------------------------------------------------------------------------------------------------------------------------------|
| <ul style="list-style-type: none"> <li>• A reduction of ~3,000 smokers by 2020</li> <li>• A reduction of ~14,000 smokers (by 2025)</li> <li>• A reduction of ~20,000 smokers (equal to saving ~10,000 Lives from smoking-related premature deaths) by 2030</li> </ul> | <p><b>Cost</b></p> <ul style="list-style-type: none"> <li>• Table</li> <li>• Display board</li> <li>• Labour cost</li> <li>• Non-labour cost</li> <li>• Cost for research and evaluation</li> <li>• Expenditure is shown in <b>Table 2(a)</b></li> </ul> | <p><b>Research and Evaluation</b></p> <ul style="list-style-type: none"> <li>• PhD project</li> </ul> | <ul style="list-style-type: none"> <li>• Federal Government Agency</li> <li>• Rotary Club</li> <li>• Six local councils within the district</li> <li>• Business industry association (Capricorn enterprise) of CQ</li> </ul> | <ul style="list-style-type: none"> <li>• Social media</li> <li>• Digital billboard</li> <li>• Community expos</li> <li>• Health events</li> </ul> <p><b>Advocated policy</b></p> <ul style="list-style-type: none"> <li>• Smoke-free hospitals</li> </ul> <p><b>Implemented mini projects</b></p> <ul style="list-style-type: none"> <li>• Smoke-free teens</li> <li>• Reduce smoking rate among Aboriginal and Torres Strait Islander pregnant women</li> </ul> |
|-----------------------------------------------------------------------------------------------------------------------------------------------------------------------------------------------------------------------------------------------------------------------|----------------------------------------------------------------------------------------------------------------------------------------------------------------------------------------------------------------------------------------------------------|-------------------------------------------------------------------------------------------------------|------------------------------------------------------------------------------------------------------------------------------------------------------------------------------------------------------------------------------|------------------------------------------------------------------------------------------------------------------------------------------------------------------------------------------------------------------------------------------------------------------------------------------------------------------------------------------------------------------------------------------------------------------------------------------------------------------|

23  
24  
25  
26  
27  
28  
29  
30  
31  
32  
33  
34  
35  
36  
37  
38  
39  
40  
41  
42  
43  
44  
45  
46

**Table 2 (a). Monetary cost spent for “10,000 Lives” initiative in 24 months (January 2018-December 2019) after launch**

| Item of cost                                       | Amount in Australian Dollar |
|----------------------------------------------------|-----------------------------|
| Labour cost (human resource)                       | \$199,600.0                 |
| Non-labour cost (Materials, supplies, travel etc.) | \$16,984.0                  |
| Evaluation and research cost (PhD project)         | \$64,164.0                  |
| <b>Net cost</b>                                    | <b>\$280,748.0</b>          |

**Table 2 (b). Occurrence of different activities and events implemented by “10,000 Lives” initiative in first 26 months**

| Event name                                                                                                                  | Frequency = N |
|-----------------------------------------------------------------------------------------------------------------------------|---------------|
| Smoking cessation summits organised                                                                                         | 7             |
| ‘World No Tobacco Day’ campaign (including a tobacco forum)                                                                 | 2             |
| Number of mini-projects implemented for priority populations                                                                | 2             |
| Film competition with the theme of smoking cessation for young people, organised                                            | 1             |
| Attended health event with “10,000 Lives” stall                                                                             | 9             |
| Attended community expo and event with "10,000 Lives stall"                                                                 | 12            |
| Brief education sessions delivered to newly recruited CQHHS staff                                                           | 20            |
| In-person meeting conducted                                                                                                 | 97            |
| Facebook pages (10000 Lives CQ, CQ Health and Triple M central Queensland) discussed posts                                  | 206           |
| Occasional share of the updated information and resources to CQHHS staff through daily news and the weekly bulletin (Drift) | 4,800         |
| Occasional emails with updated information and resources to the personnel from partner organisations other than CQHHS       | 3,409         |

**Table 2 (c). Numbers of partners and champions contacted, and numbers who supported the “10,000 Lives” initiative in first 26 months**

| Group/Organisation                                                                                                    | No. contacted = N | No. Champions <sup>†</sup> /Supporter <sup>‡</sup> /<br>Partner <sup>§</sup> /Participants <sup>□</sup><br>identified = n(%) |
|-----------------------------------------------------------------------------------------------------------------------|-------------------|------------------------------------------------------------------------------------------------------------------------------|
| Clinical Staff <sup>†</sup>                                                                                           | 133               | 7 (5.3)                                                                                                                      |
| Community Service Staff <sup>†</sup>                                                                                  | 26                | 2 (7.7)                                                                                                                      |
| GP centres <sup>†</sup>                                                                                               | 76                | 1 (1.3)                                                                                                                      |
| Regional and local council staff <sup>‡</sup>                                                                         | 15                | 6 (40)                                                                                                                       |
| Politicians <sup>‡</sup> including Minister, MP, Mayor, Councillors                                                   | 24                | 24 (100)                                                                                                                     |
| Organisations <sup>§</sup> for collaboration                                                                          | 18                | 15 (83.3)                                                                                                                    |
| Clinicians <sup>□</sup> for having smoking cessation masterclass training                                             | 133               | 70 (52.6)                                                                                                                    |
| Students/teens <sup>□</sup> registered for film competition                                                           | 21                | 6 (28.6)                                                                                                                     |
| Indigenous volunteers <sup>□</sup> trained for Brief intervention training by B.strong collaborated by “10,000 Lives” | 90                | 40 (40)                                                                                                                      |
| Total                                                                                                                 | 536               | 171 (31.9)                                                                                                                   |

<sup>†</sup> **Champion:** The people or the unit who routinely worked for smoking cessation, kept regular communication with feedback to SPO of “10,000 Lives” of his smoking cessation activities.

<sup>‡</sup> **Supporter:** Provided support and did advocacy for ‘10,000 lives’ initiative

<sup>§</sup> **Partners:** Collaborated and worked together with “10,000 Lives” initiative

<sup>□</sup> **Participants:** Participated in training/program/competition

1  
2  
3 **Figure legends:**  
4

5  
6 **Figure 1 title:** Logic model for evaluation of “10,000 Lives” initiative.  
7

8  
9 **Figure 2 title:** Study Area Map; “10,000 Lives” initiative’s catchment area.

10 **Figure 2 caption:** Map showing the “10,000 Lives” initiative’s target area (highlighted in green) which is the  
11 CQHHS catchment area. Red dots are indicated for the hospitals of CQHHS (Source:

12 <https://www.health.qld.gov.au/maps/mapto/centralqld>)  
13

14  
15 **Figure 3 title:** Examples of communication materials utilised in “10,000 Lives” initiative.  
16  
17  
18  
19  
20  
21  
22  
23  
24  
25  
26  
27  
28  
29  
30  
31  
32  
33  
34  
35  
36  
37  
38  
39  
40  
41  
42  
43  
44  
45  
46  
47  
48  
49  
50  
51  
52  
53  
54  
55  
56  
57  
58  
59  
60

# Evaluation Framework of "10,000 Lives" Initiative

## Input and activity

## Output

## Impact

## Outcome

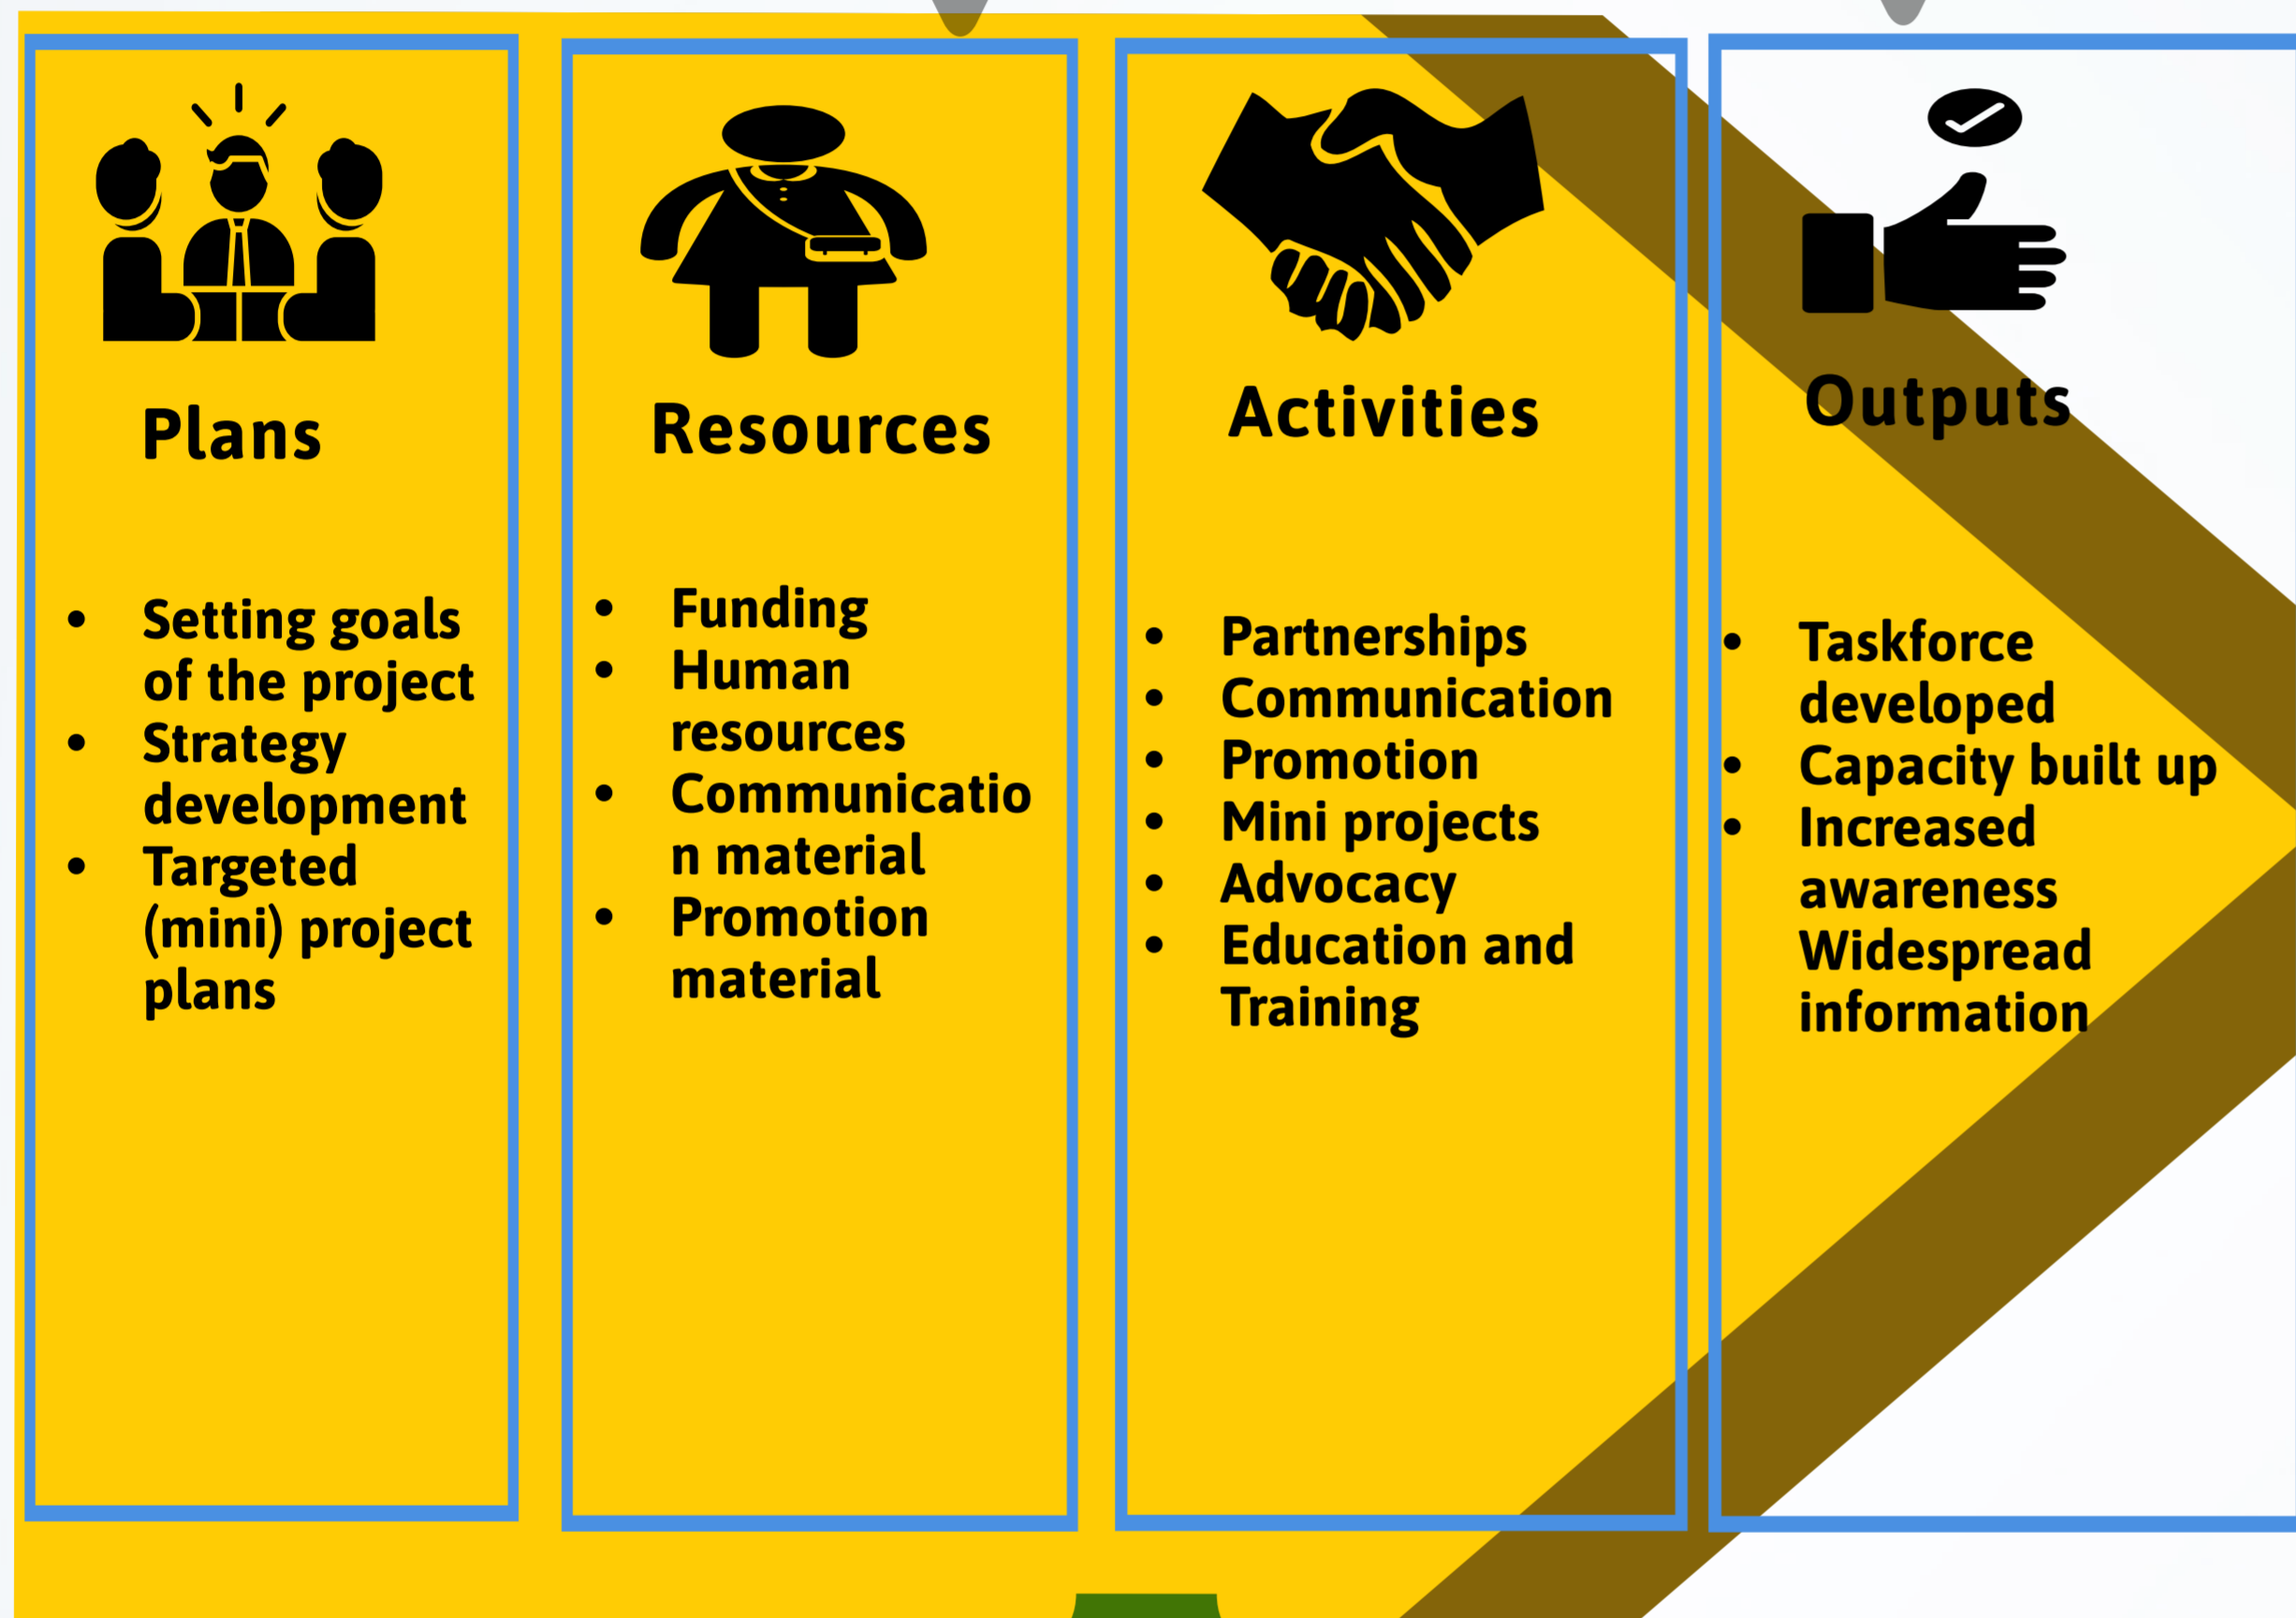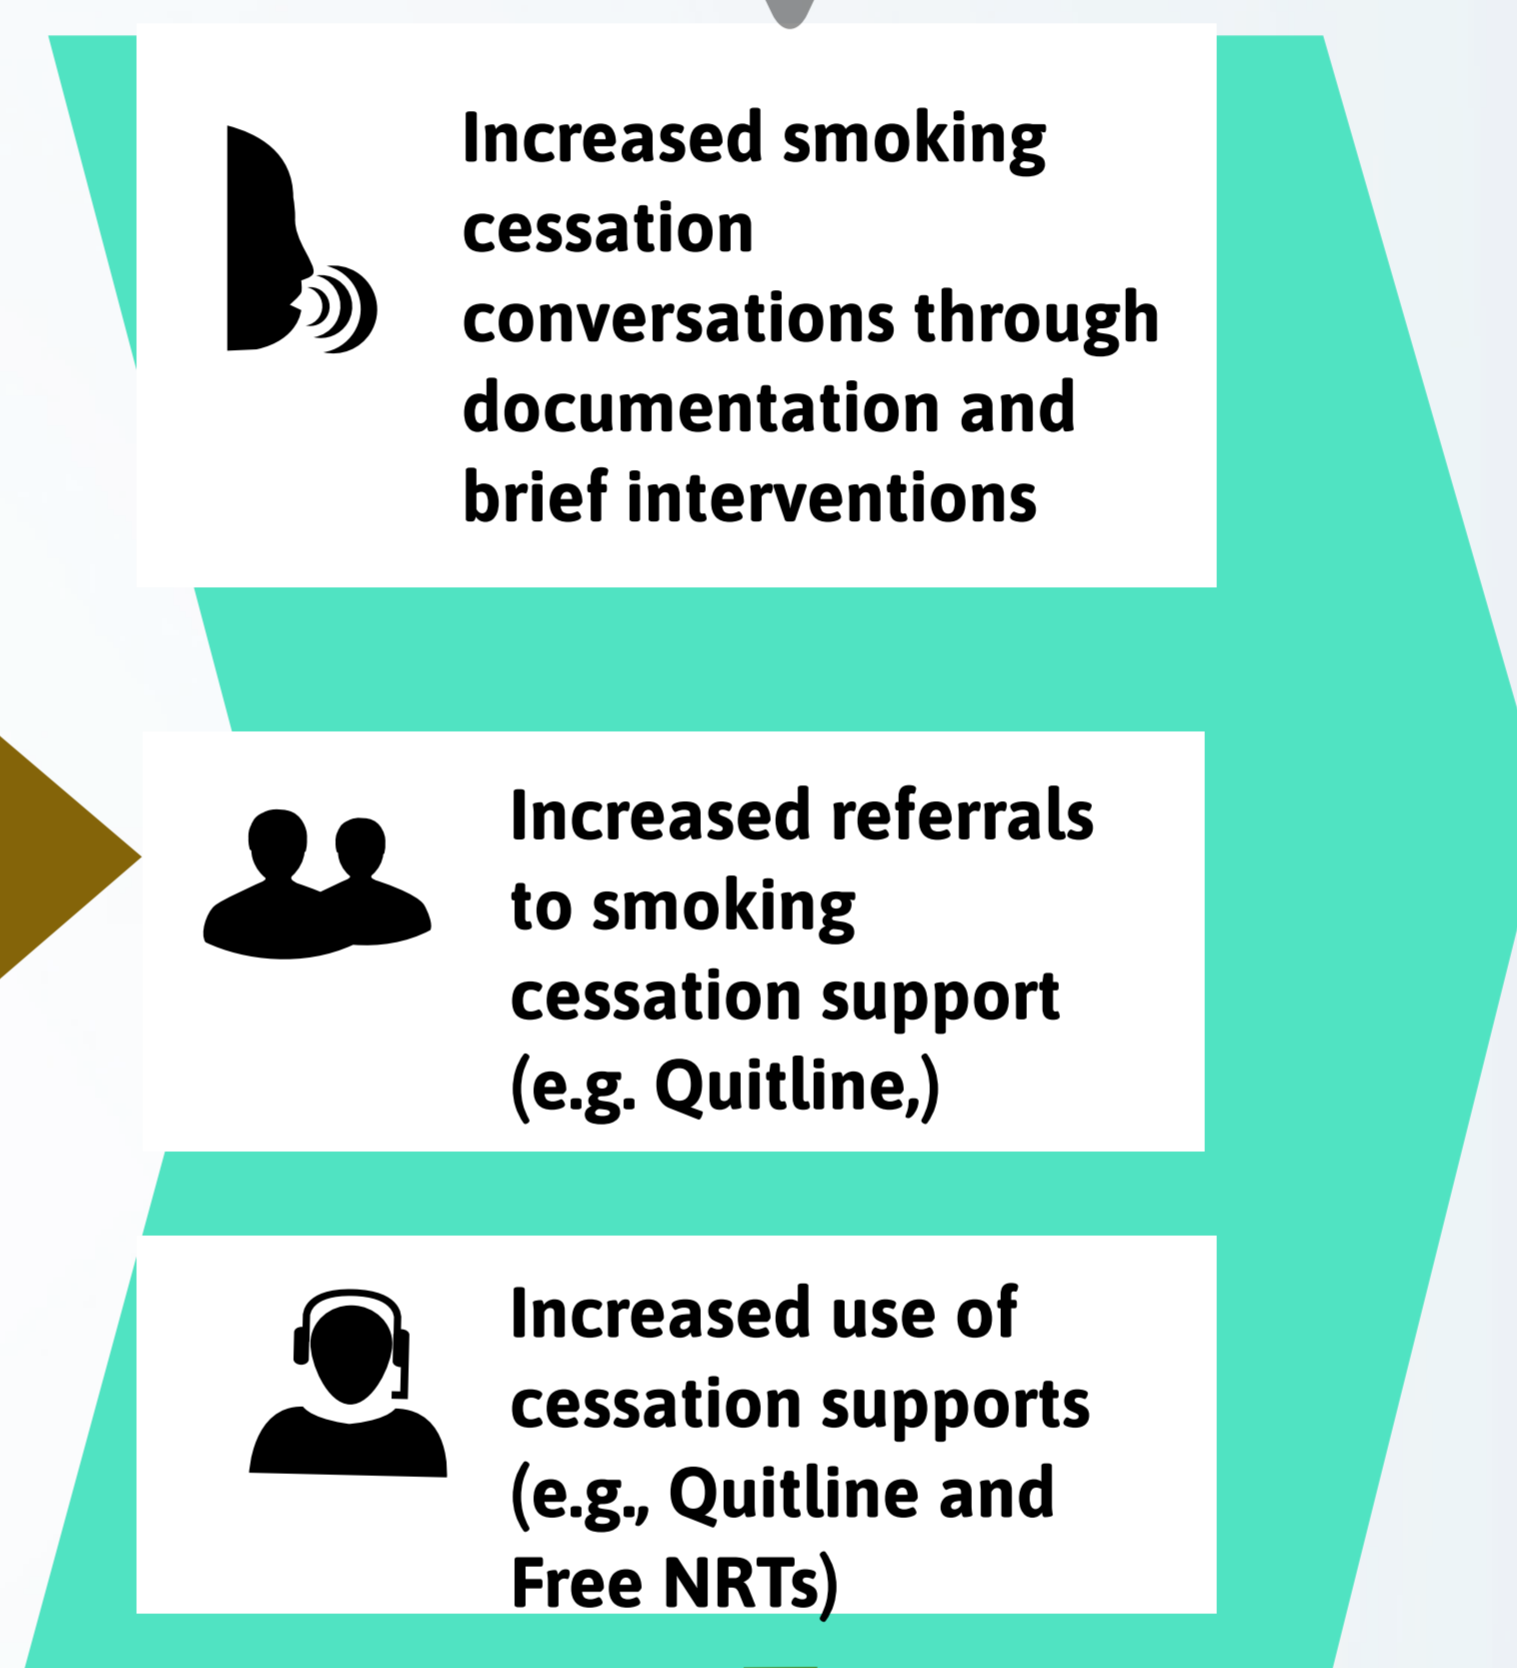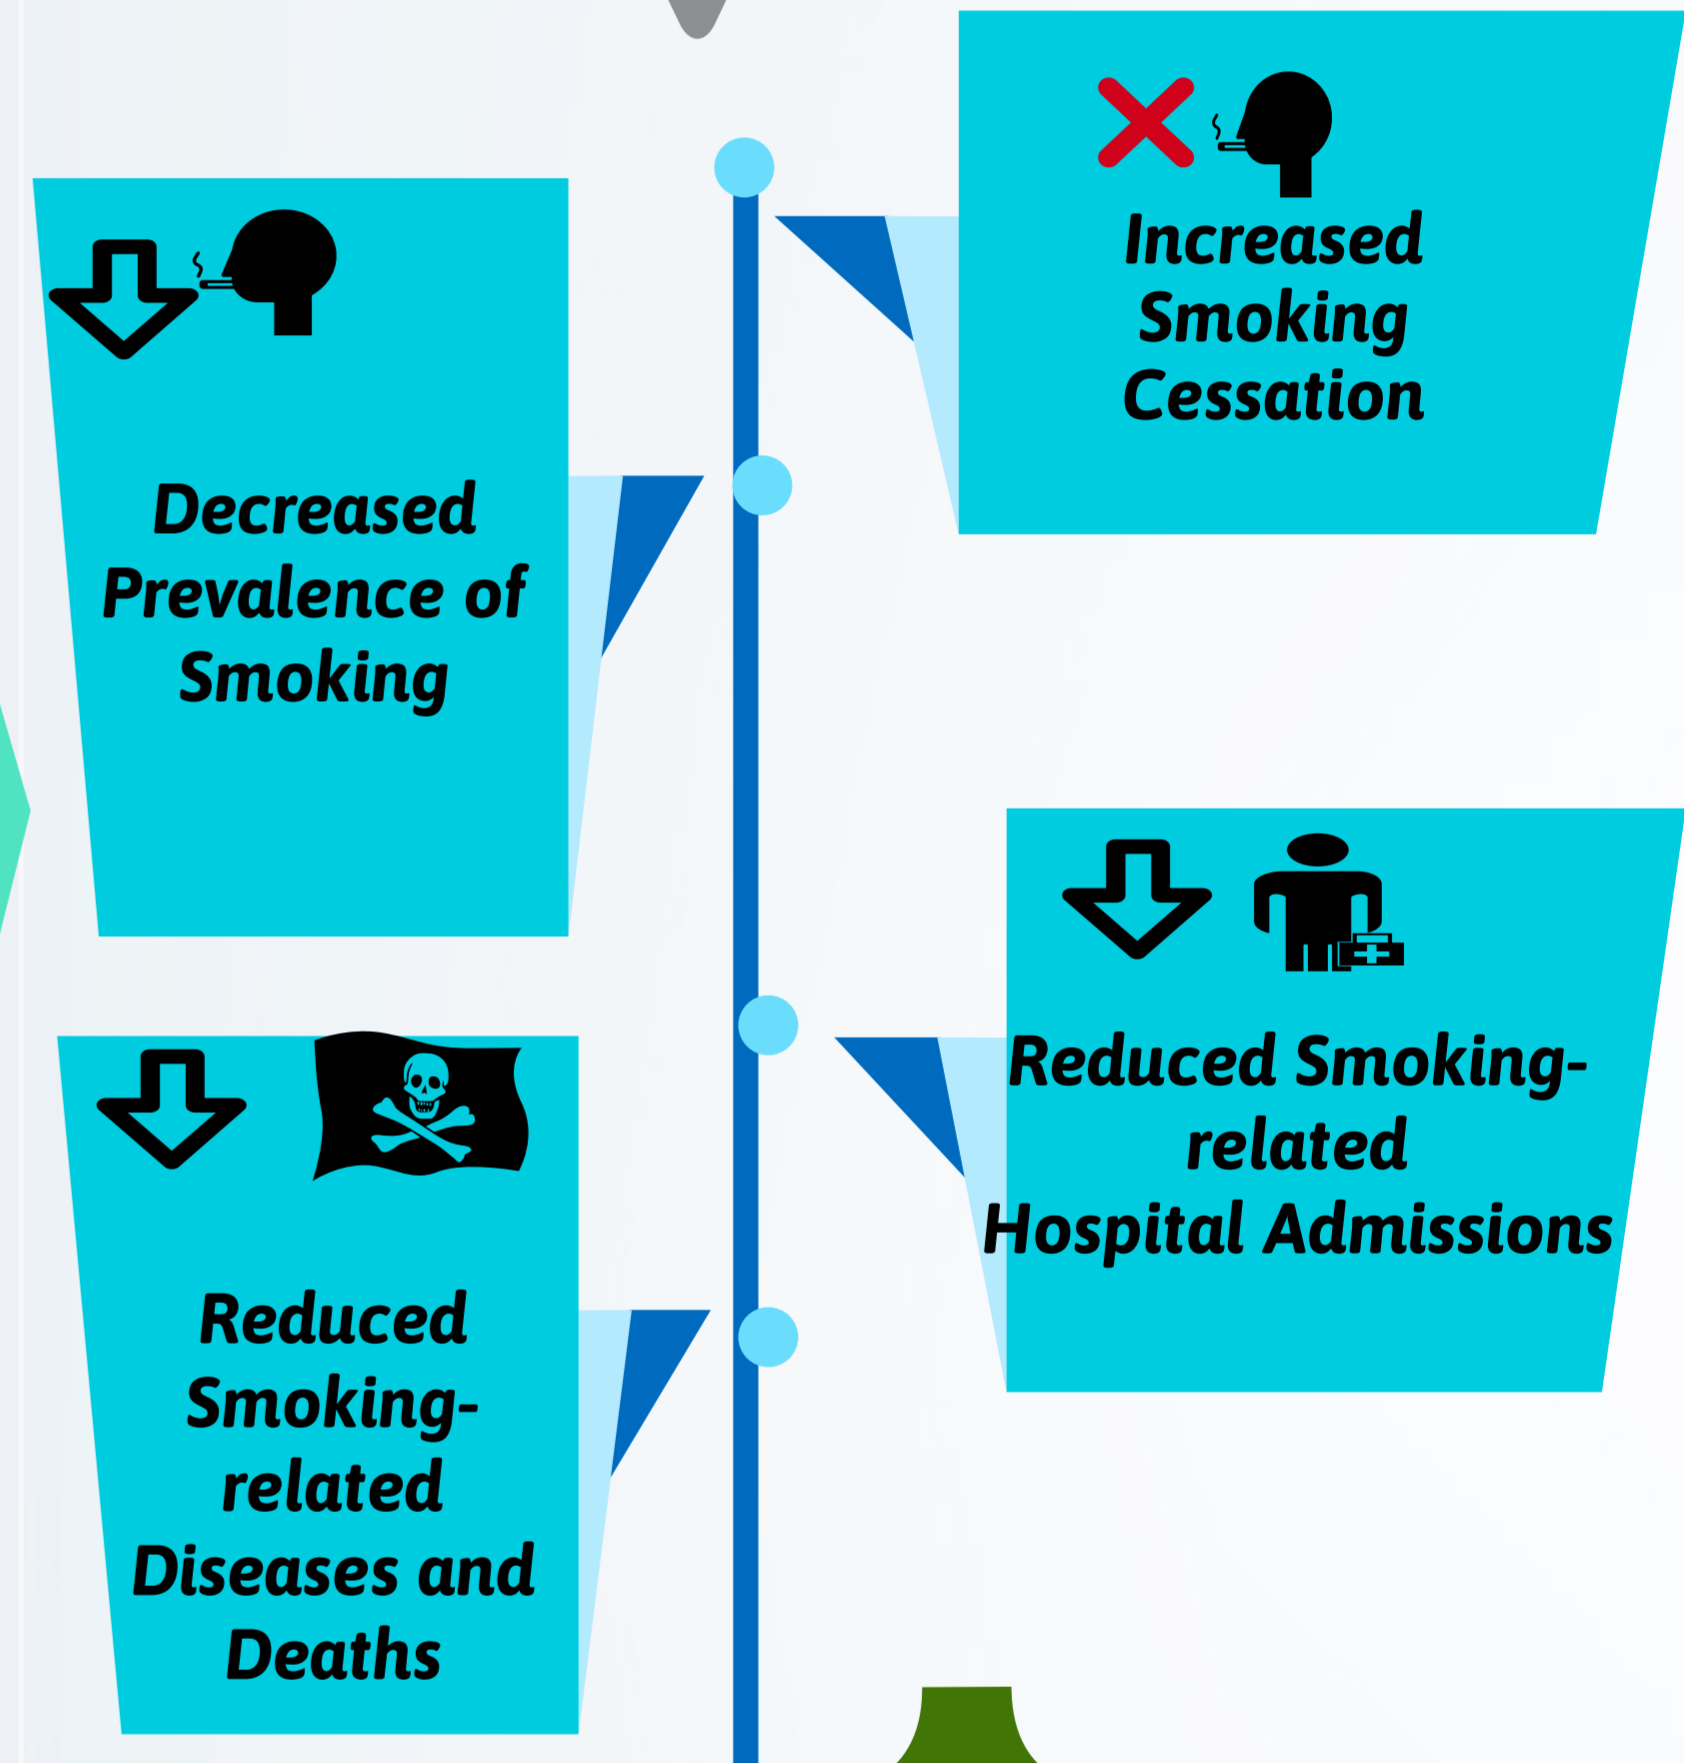

**Mapping plans, strategies, activities, outputs including prospects and challenges of the program**

- Data Extraction from project document, observation and key informant interviews
- Data analysis and interpretation

**Exploring stakeholder's role, experience and perception about "10,000 Lives"**

- Online survey among stakeholders. In-depth interviews if required
- Data analysis and interpretation

**Immediate impact evaluation (over -36 months to +24 months)**

- Quitline and Hospital data collection
- Data analysis and interpretation (pre-post comparison)

**Short to long-term outcome evaluation (over -36 months to 36+ months)**

- Data collection regarding rate of smoking, smoking related hospital admissions and deaths
- Data analysis and interpretation (pre-post comparison)

Assumptions and External factors

1  
2  
3  
4  
5  
6  
7  
8  
9  
10  
11  
12  
13  
14  
15  
16  
17  
18  
19  
20  
21  
22  
23  
24  
25  
26  
27  
28  
29  
30  
31  
32  
33  
34  
35  
36  
37  
38  
39  
40  
41  
42  
43  
44  
45  
46  
47  
48  
49  
50  
51  
52  
53  
54  
55  
56  
57  
58  
59  
60

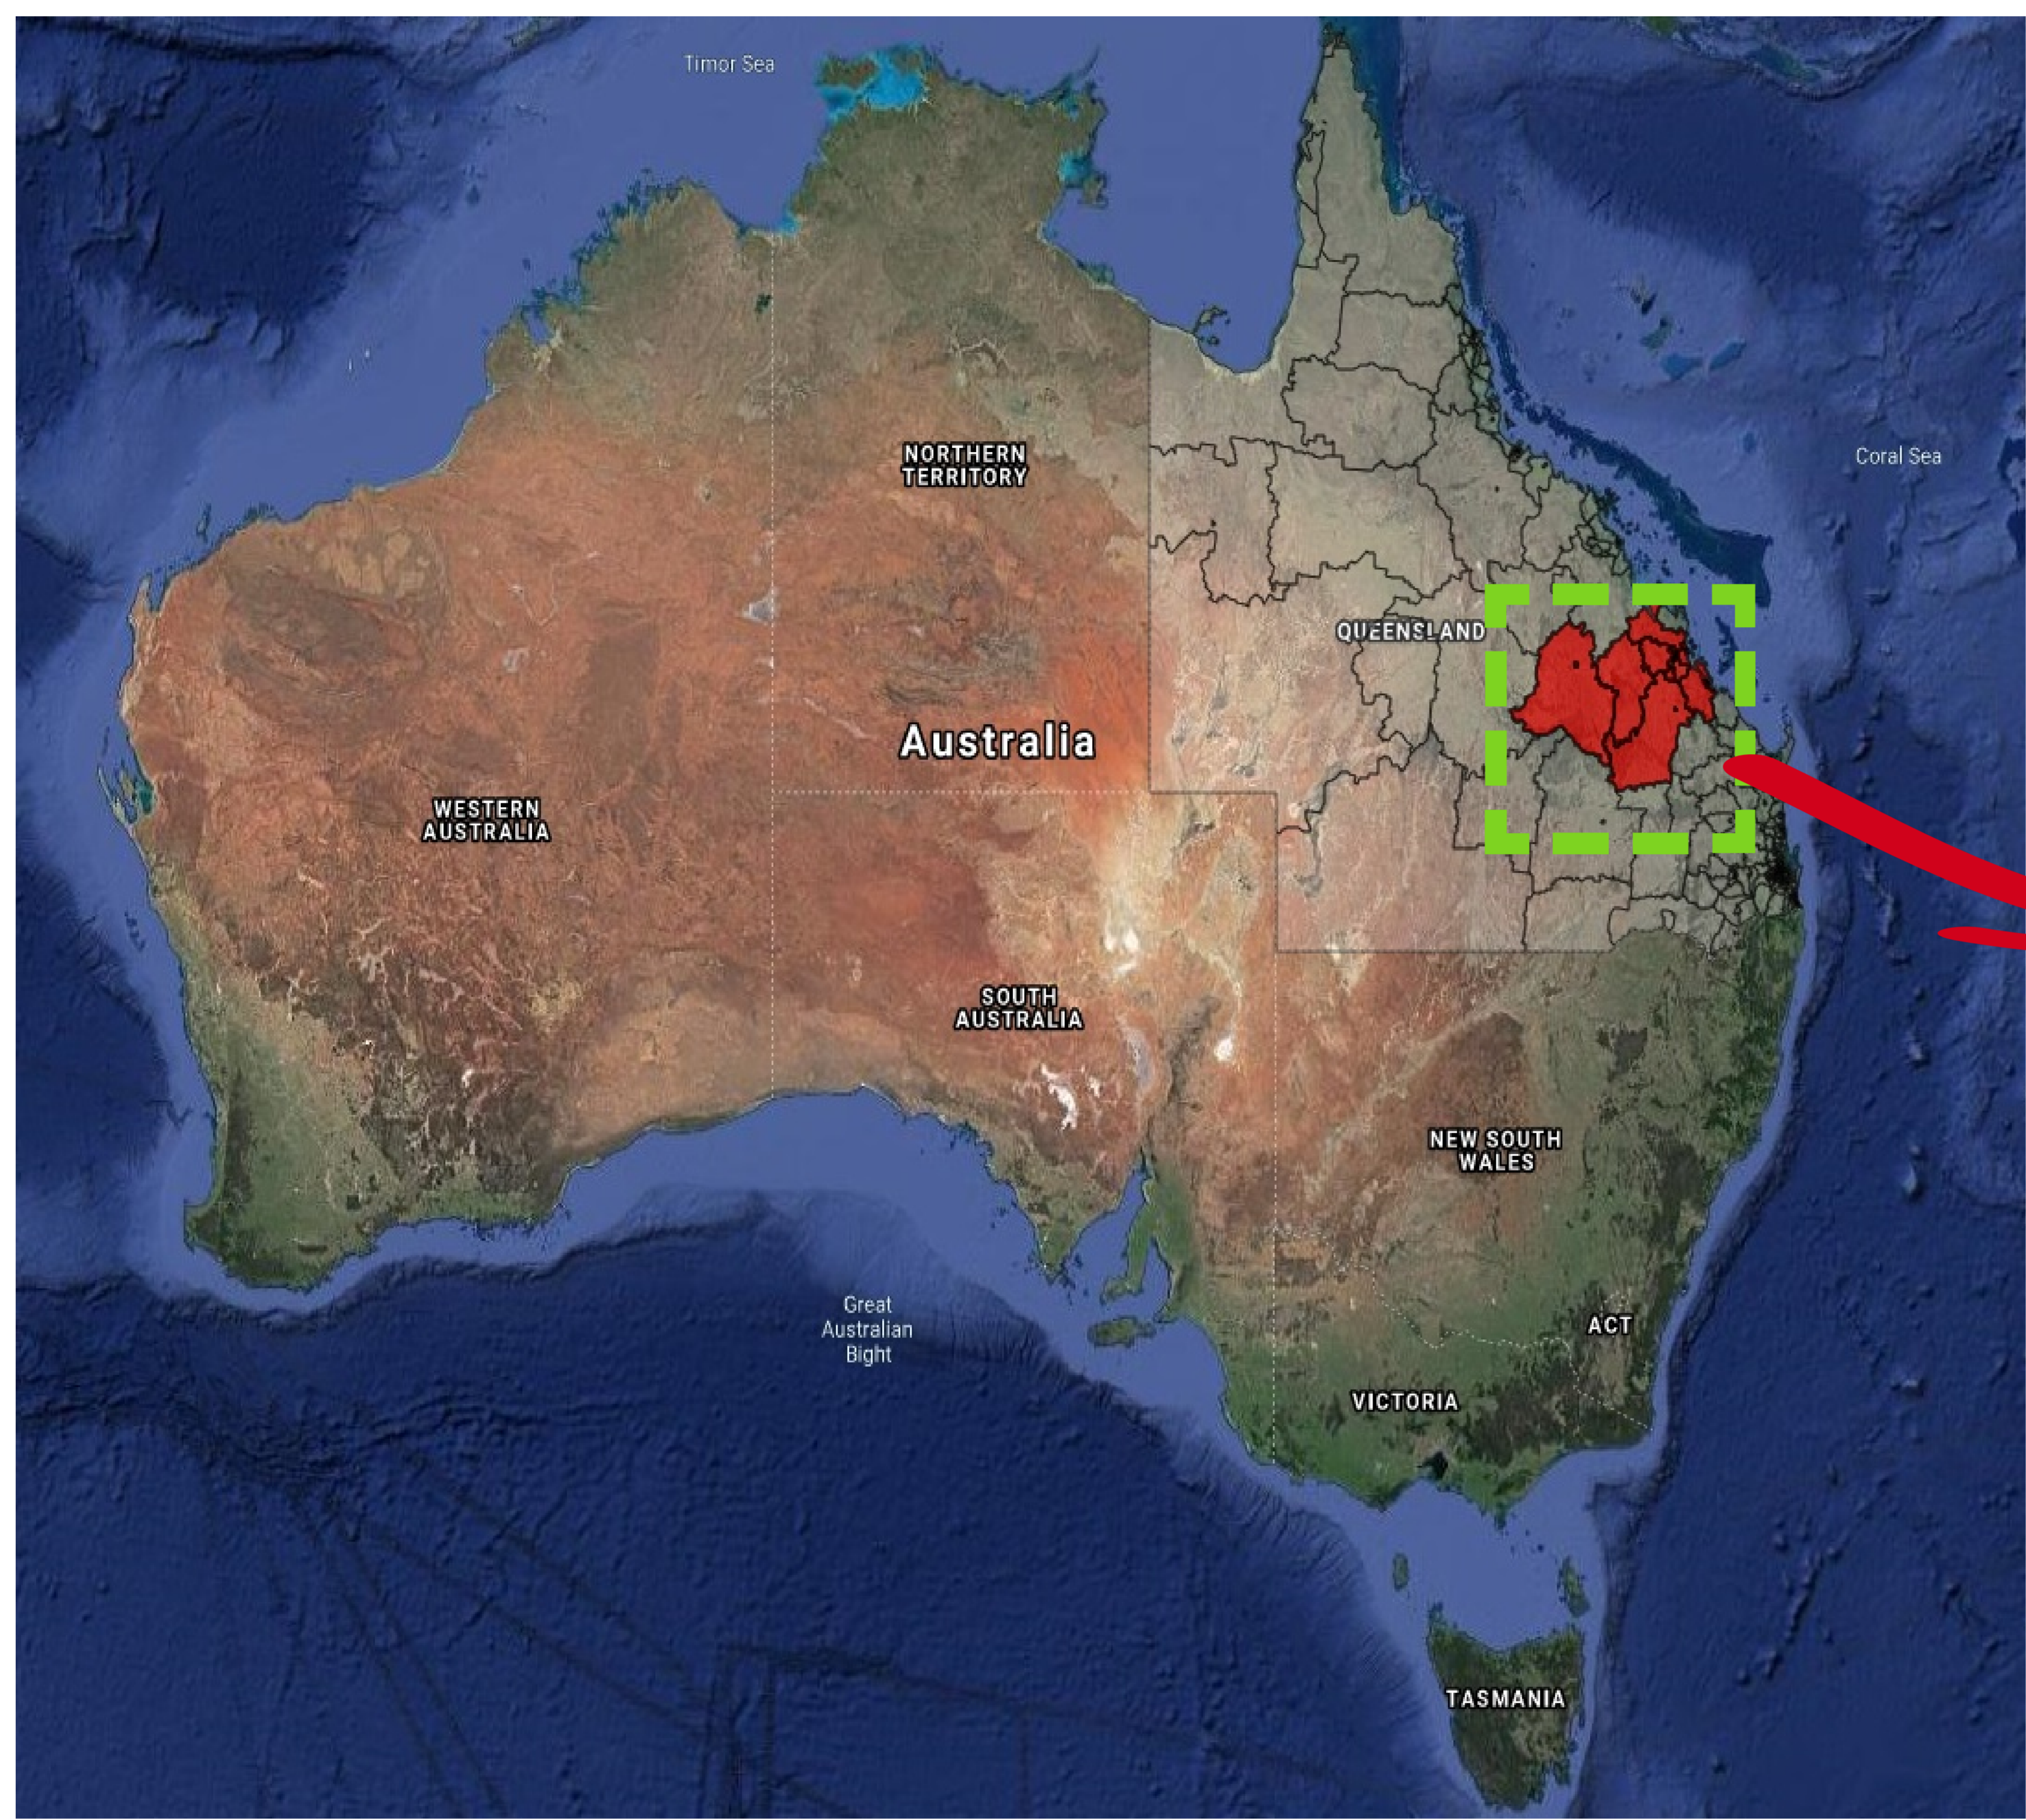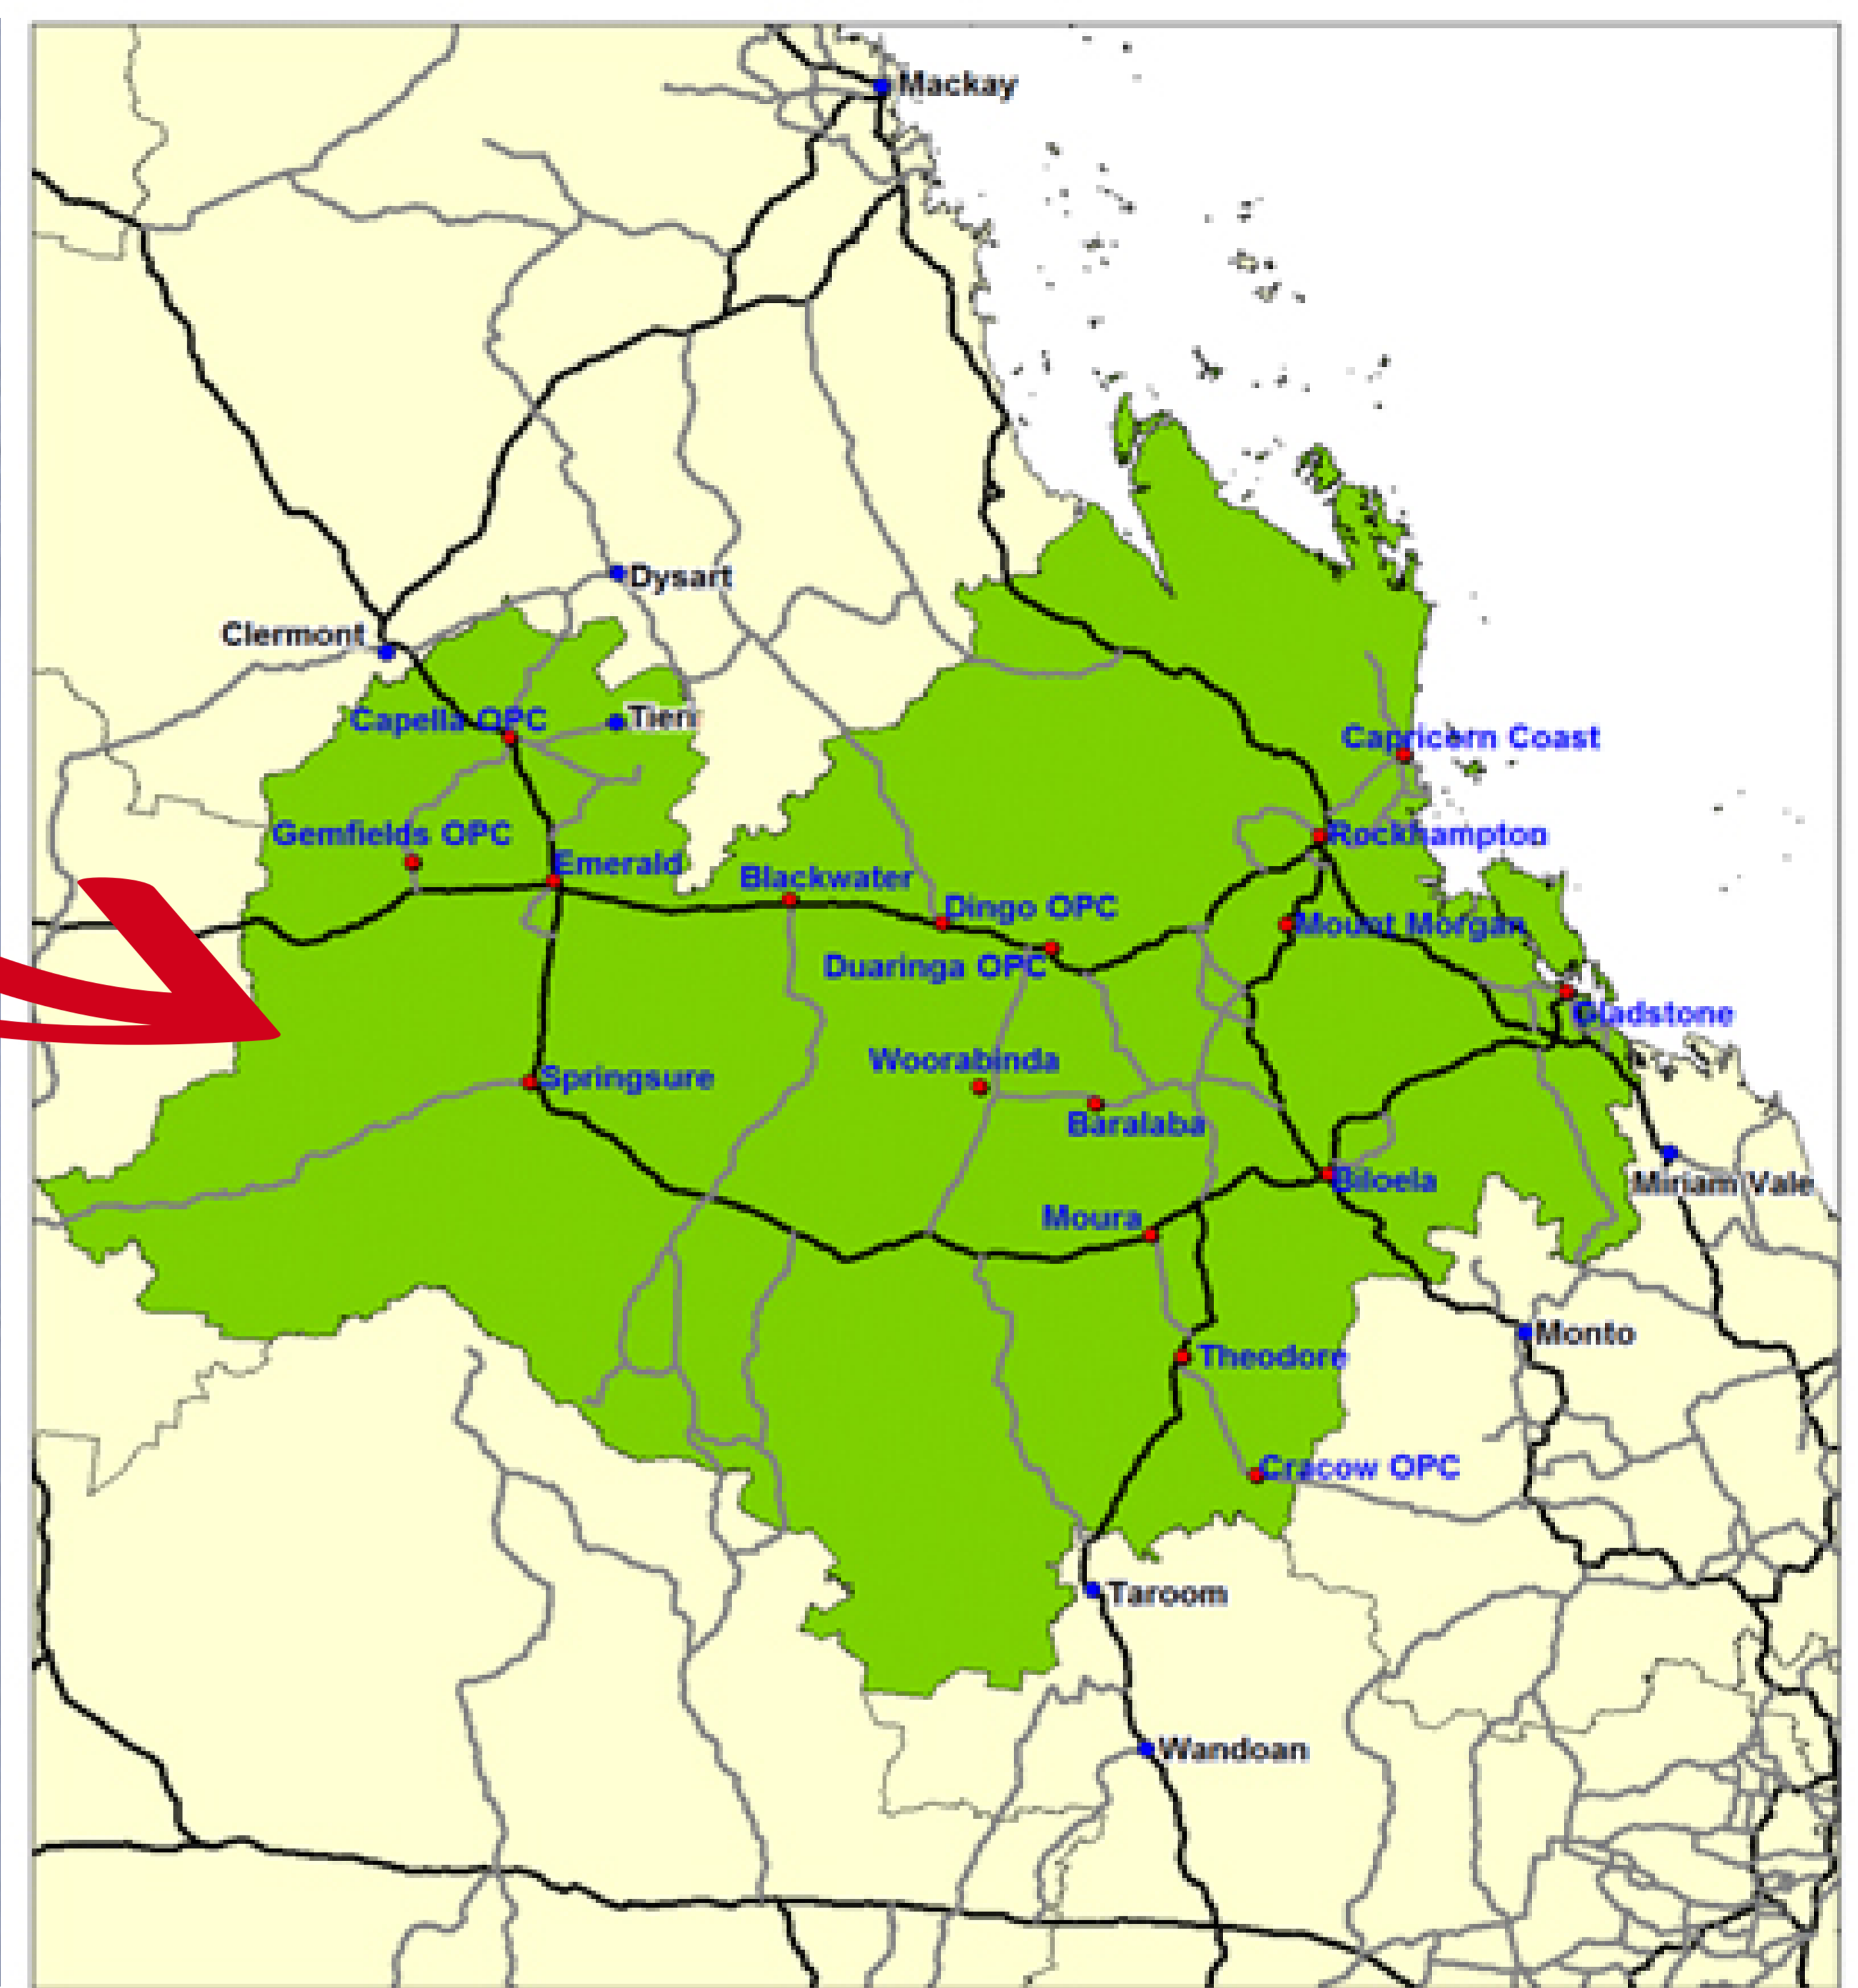

**Map of Australia  
(Central Queensland highlighted in red, inset)**

**Central Queensland Hospital and health  
Service catchment area (highlighted in  
green) is the target area of "10,000  
Lives" initiative**

# Newspaper

# Weekly bulletin

# Facebook page

24 Mar 2018  
Gladstone Observer, Gladstone QLD

Section: General News - Article type: News Item - Classification: Regional  
Audience: 4,546 - Page: 9 - Printed Size: 218,000mm<sup>2</sup> - Market: QLD - Country: Australia  
ASR: AUQ 228 - Words: 175 - Item ID: 500419097

esentia.mediaportal  
Licensed by Copyright Agency. You may not copy or communicate this work with a licence.

Page 1 of 1



**CQ teams' smoke-free living**

YOU don't get to be an elite athlete by smoking a pack a day. Growing up surrounded by smokers, Tia chose an alternative path, leading her to the healthy lifestyle she lives today. "I have grown up surrounded by smokers in both my family and friends and I don't like the smell or effect it has on their health," Tia said. With their home ground, Browne Park, being a smoke-free, Jack said it was important the club promote the help their smoking fans could access. "It's important for the Capras to support our smoking fans by informing them they can access 12 weeks of free nicotine replacement therapy and personalised support if they call Quitline (13QUIT)," he said.

On World No Tobacco Day Rhondeen Booth can breathe easy knowing she's given her unborn child the best possible start in life. Rhondeen is one of 5000 Central Queenslanders who have registered with Quitline for free quit-smoking support and resources as part of CQ Health's 10,000 Lives project which was launched in November 2017. The project recognises that smoking is one of the biggest preventable causes of health conditions and aims to save 10,000 lives by encouraging people to quit smoking or to never start in the first place. Senior Project Officer Kallie Green said 17% of Central Queensland women smoke when pregnant. "This is a big target with CQ Health clinicians who explain the effects smoking has on unborn babies and then children as they grow up in a smoking household," she said. "Our Gumma Gundoo Indigenous Maternity Service team are fantastic at supporting their clients to get the best outcomes through making healthy choices." Rhondeen is keen to welcome her new baby daughter in the next few days and is happy she'll be acting as a positive role model for all four of her children. Health worker Lorgay lies is proud of Rhondeen, having worked with her over the past few months while she made the choice to quit. Her partner Dwayne has also cut right back on his smoking habit, keen to provide a healthy environment for his family. All Central Queenslanders have access to free support and resources to help quit smoking. Just call Quitline on 13 78 48.

the DRIFT

31 MAY 2019 — CENTRAL QUEENSLAND HOSPITAL AND HEALTH SERVICE



**5000 seek Quitline help**

On World No Tobacco Day Rhondeen Booth can breathe easy knowing she's given her unborn child the best possible start in life. Rhondeen is one of 5000 Central Queenslanders who have registered with Quitline for free quit-smoking support and resources as part of CQ Health's 10,000 Lives project which was launched in November 2017. The project recognises that smoking is one of the biggest preventable causes of health conditions and aims to save 10,000 lives by encouraging people to quit smoking or to never start in the first place. Senior Project Officer Kallie Green said 17% of Central Queensland women smoke when pregnant. "This is a big target with CQ Health clinicians who explain the effects smoking has on unborn babies and then children as they grow up in a smoking household," she said. "Our Gumma Gundoo Indigenous Maternity Service team are fantastic at supporting their clients to get the best outcomes through making healthy choices." Rhondeen is keen to welcome her new baby daughter in the next few days and is happy she'll be acting as a positive role model for all four of her children. Health worker Lorgay lies is proud of Rhondeen, having worked with her over the past few months while she made the choice to quit. Her partner Dwayne has also cut right back on his smoking habit, keen to provide a healthy environment for his family. All Central Queenslanders have access to free support and resources to help quit smoking. Just call Quitline on 13 78 48.

Search Facebook

10000 Lives | Stop Smoking



**Quitline**  
13 78 48

**CQ Health**  
1 June 2020

In 2016, the estimated social and health costs of tobacco use was \$136.7 billion in Australia, and people who quit said that the cost of smoking and its effect on their health were their main reasons. We encourage all CQ smokers to call Quitline on 137848 and ask about tailored phone support and 12 weeks of free patches, gum and lozenges posted to your home. Choosing to quit could save you thousands very quickly - just look at what one packet of smokes can buy you in healthy food. What would you spend your savings on? Information and support visit <https://quitline.qld.gov.au> #cqhealth #tobaccofree #quitq #moneysaver #quitsmoking

About  
Welcome! The 10,000Lives Stop Smoking support group is for anyone from Central Queensland (CQ) preparing to quit smoking or has quit smoking. If... See more

Private  
Only members can see who's in the group and what they post.

Visible  
Anyone can find this group.

General group

# Poster

# Poster

# Poster

**#10000LivesCQ**  
Join the movement!  
10000lives@health.qld.gov.au

Health  
**Quitline**  
13 78 48

**Congratulations! You are on your way to being a non-smoker**

**Facts about Nicotine Replacement Therapy (NRT)**

- Nicotine from other sources such as patches, inhalers, gum or lozenges (NRT) enters the body slower and at a much smaller dose than smoking.
- NRT provides nicotine into the body without the harmful chemicals found in cigarette smoke.
- This is less likely to raise your heart rate or blood pressure than smoking. It is safe to use patches if you have heart disease and it is always safer to use patches than it is to smoke.
- If you use enough NRT, smoking should become less enjoyable, so make sure you use more NRT to help with cravings, not less.
- Continue to use NRT for at least 8-12 weeks or as directed by your doctor.
- It is also safe to use more than one NRT product at the same time, e.g. patch, gum, lozenge, inhaler.

**Here are some tips to help you stay smoke free!**

- Eating breakfast will help with cravings, so can eating a small dessert after a main meal.
- Doing some exercise can help with cravings, so can drinking less coffee.
- Drinking less alcohol can increase your chances of successfully quitting.
- Make your house and car smoke free, and avoid being around other smokers.
- Changing routines that you normally associated with smoking can help you decrease your daily cigarette intake.

If you continue to have cravings, use more NRT not less and seek support from your doctor or Quitline. If you smoke one or a few cigarettes, you have not failed. Continue the program as planned. Don't give up!

**MORE INFORMATION**

- Call Quitline 13 7848 or visit <http://www.quitnow.gov.au/>
- Download the 'My QuitBuddy' app on your smartphone to track your progress
- See your local doctor, pharmacist or healthcare provider when you are at home
- Aboriginal and Torres Strait Islander Support: <http://quit.nosmokes.com.au/>

Great care for Central Queenslanders  
Central Queensland Hospital and Health Service

**Smoking... What is it costing you?**

| Cigarettes          | Weekly Cost | Monthly Cost | 3 months (Quitline offers 12 weeks free NRT) | Yearly Cost | Over 5 Years |
|---------------------|-------------|--------------|----------------------------------------------|-------------|--------------|
| 10 cigarettes a day | \$98        | \$392        | \$1,176                                      | \$4,704     | \$23,520     |
| 20 cigarettes a day | \$196       | \$784        | \$2,352                                      | \$9,408     | \$47,040     |
| 30 cigarettes a day | \$294       | \$1,176      | \$3,528                                      | \$14,112    | \$70,560     |

Based on a 25 pack of cigarettes at \$39.

| Roll your owns  | Weekly Cost | Monthly Cost | 12 weeks (Quitline offers 12 weeks free NRT) | Yearly Cost | Over 5 Years |
|-----------------|-------------|--------------|----------------------------------------------|-------------|--------------|
| 50 grams a week | \$82.75     | \$331        | \$993                                        | \$4,303     | \$21,515     |

\*Costs based on average supermarket prices. Costs do not include filters, paper or lighter.

Check out how much smoking is costing you by visiting [www.quitline.qld.gov.au](http://www.quitline.qld.gov.au)

**#10000LivesCQ**  
Join the movement!  
**Quitline**  
13 78 48

All Central Queensland smokers are eligible for Quitline's tailored program of:

- 12 weeks of free nicotine replacement therapy posted to your home
- 4 confidential call backs with a Quitline counsellor to support you through quitting

Call Quitline now on 13 78 48 (7am - 10pm, 7 days a week) or visit [www.quitline.qld.gov.au](http://www.quitline.qld.gov.au)

**Quitline**  
13 78 48

**FREE! Nicotine Replacement Therapy to CQ Smokers**

Research shows that the best way to quit smoking is to use nicotine replacement therapy (NRT) or quit smoking medication in combination with support from Quitline or a health professional.

Quitline is offering Central Queensland smokers a tailored quit smoking program which includes 12 weeks of free NRT posted to your home.

Be one of the 10,000Lives saved in Central Queensland - Call Quitline on 137848

**#10000LivesCQ**  
Join the movement!

# Fridge magnet

# Footpath Sign

**#10000LivesCQ**  
Join the movement!

Health  
Great care for Central Queenslanders  
**Quitline**  
13 78 48

All Central Queensland smokers are eligible for Quitline's tailored program of:

- 12 weeks of free nicotine replacement therapy posted to your home
- 4 confidential call backs with a Quitline counsellor to support you through quitting

Call Quitline now on 13 78 48

**We are SMOKE-FREE**

**Quitline**  
13 78 48

Health  
**#10000LivesCQ**  
Join the movement!

# Digital Display Board

# Exhibition

**Quit smoking** #10000LivesCQ  
with free therapies and phone support  
Call Quitline on 13 78 48

Health  
Great care for Central Queenslanders  
**Quitline**  
13 78 48

Quit smoking with free therapies and phone support  
Call Quitline on 13 78 48

Health  
Great care for Central Queenslanders  
**Quitline**  
13 78 48

Health  
Great care for Central Queenslanders

**Join the movement!**

**#10000LivesCQ**  
10000lives@health.qld.gov.au

**Quitline**  
13 78 48

Changes in Quitline registration since the launch of the "10,000 Lives" campaign in Central Queensland, Australia

**We are SMOKE-FREE**  
**Quitline**  
13 78 48
